# Supplementary material for: Design, Synthesis and Structure-Activity Relationship Studies of Nicotinamide Derivatives as Potent Antifungal Agents by Disrupting Cell Wall
Source: MDPI journal article supplement (doi:10.3390/molecules28031135), 2023-01-23
Supplement: s1 [file s1]

# Supporting Information

## Design, Synthesis and Structure-Activity Relationship Studies of Nicotinamide Derivatives as Potent Antifungal Agents by Disrupting Cell Wall

Tingjunhong Ni <sup>1,†</sup>, Fei Xie <sup>2,†</sup>, Liping Li <sup>1,†</sup>, Yumeng Hao <sup>2</sup>, Xiaochen Chi <sup>3</sup>, Lan Yan <sup>2</sup>, Dazhi Zhang <sup>1,2,\*</sup>, Yuanying Jiang <sup>1,\*</sup> and Quanzhen Lv <sup>2,\*</sup>

<sup>1</sup> Department of Pharmacy, Shanghai Tenth People's Hospital, School of Medicine, Tongji University, No.1239 Siping Road, Shanghai 200092, China

<sup>2</sup> School of Pharmacy, Naval Medical University, No.325 Guohe Road, Shanghai 200433, China

<sup>3</sup> School of Chinese Materia Medica, Shenyang Pharmaceutical University, Shenyang 110016, China

\* Correspondence: zdzhang\_yjhx@smmu.edu.cn (D.Z.); 13761571578@163.com (Y.J.); lvquanzhen2011@163.com (Q.L.)

† These authors contributed equally to this work.

### Table of Contents

|                                               |     |
|-----------------------------------------------|-----|
| NMR Spectra of Target Compounds.....          | S2  |
| HPLC Spectra of Representative Compounds..... | S38 |

# NMR Spectra of Target Compounds

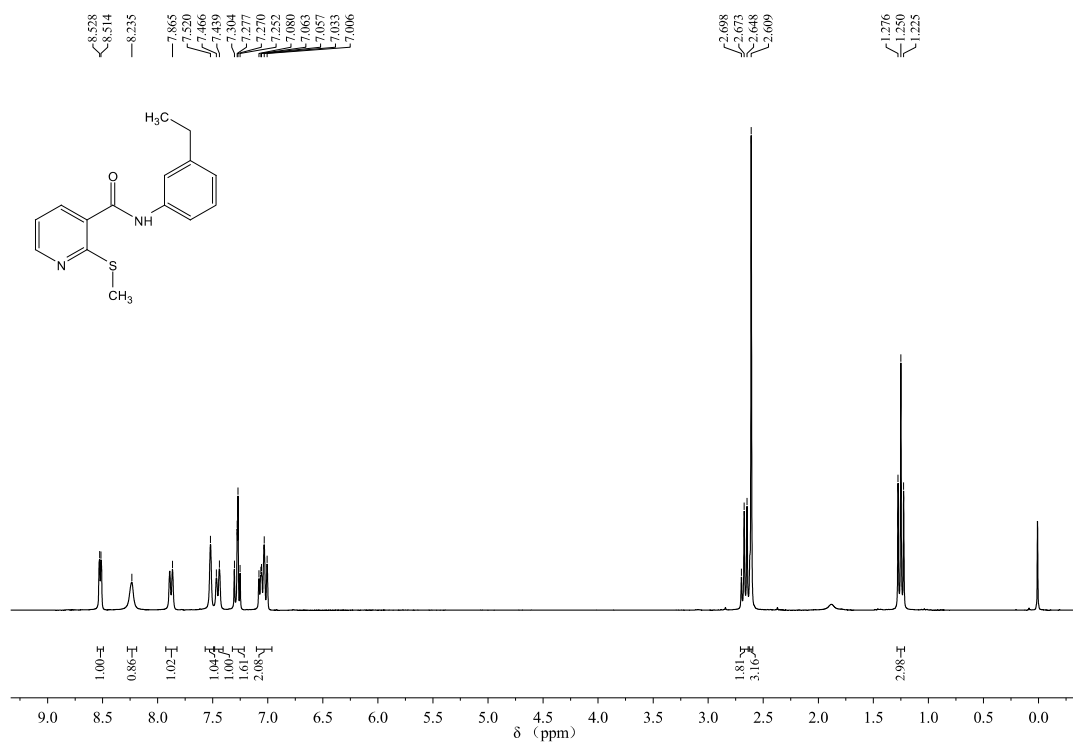

<sup>1</sup>H NMR spectra of 16a

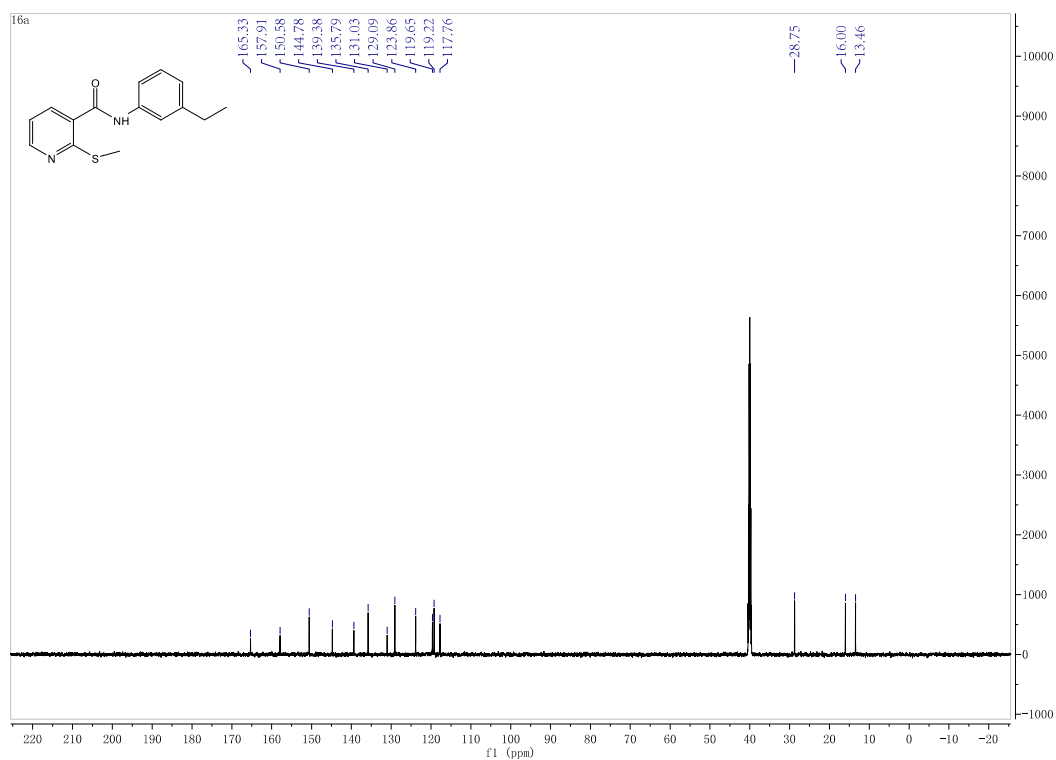

<sup>13</sup>C NMR spectra of 16a

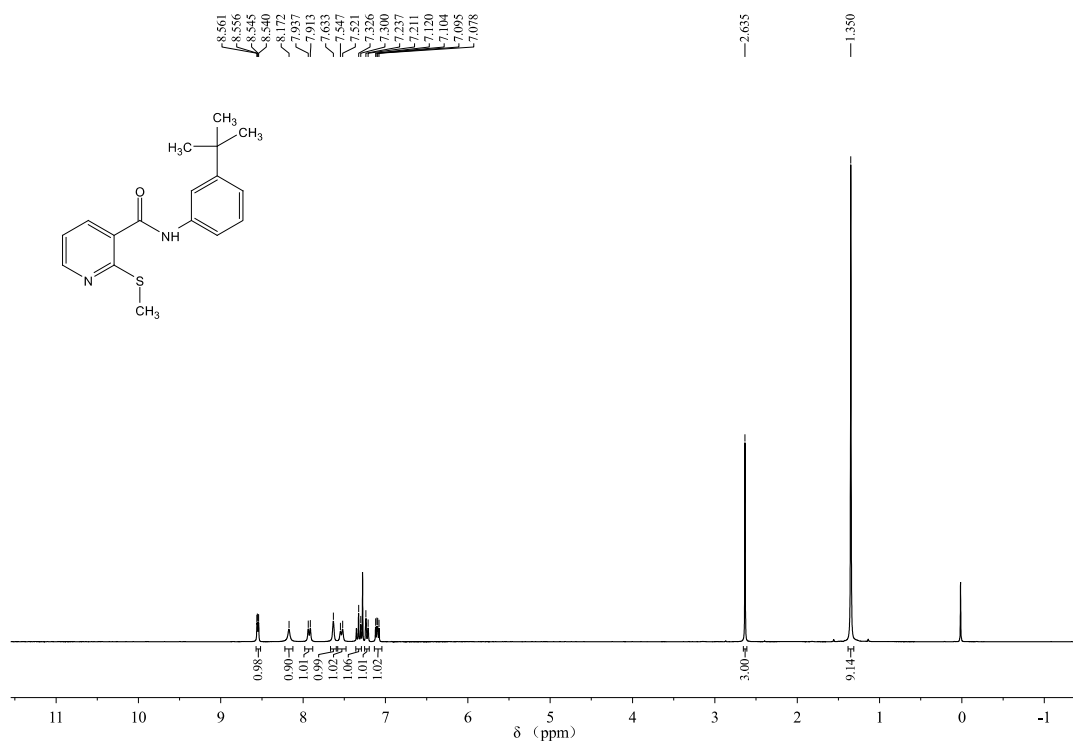

**<sup>1</sup>H NMR spectra of 16b**

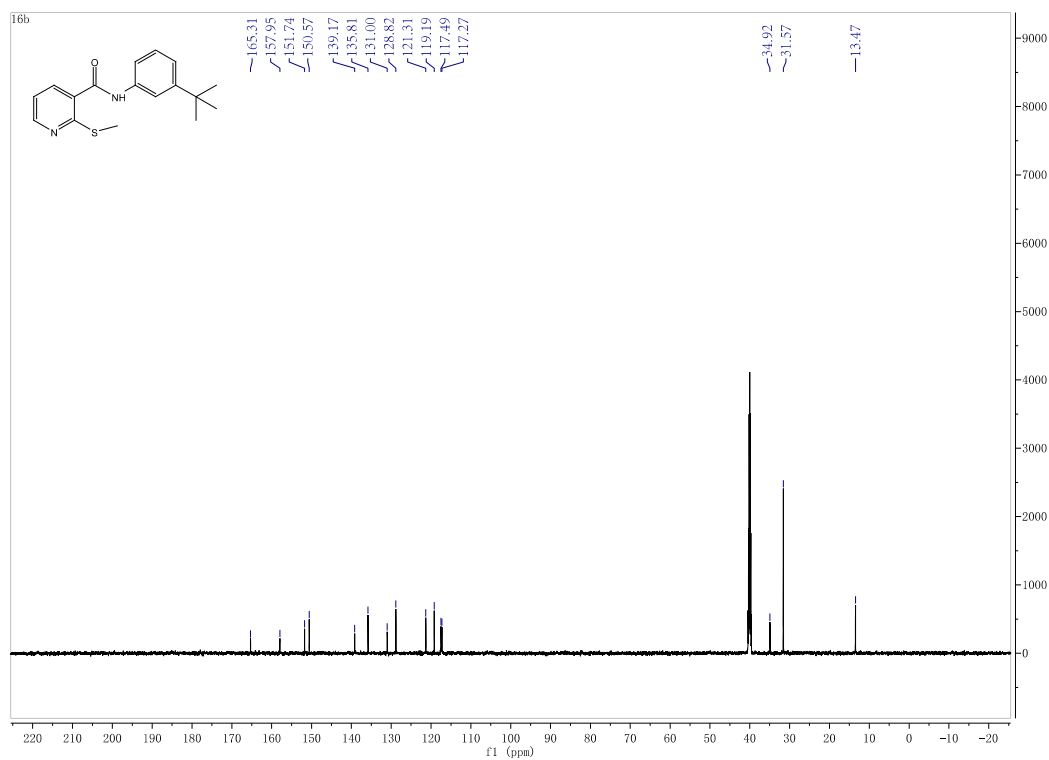

**<sup>13</sup>C NMR spectra of 16b**

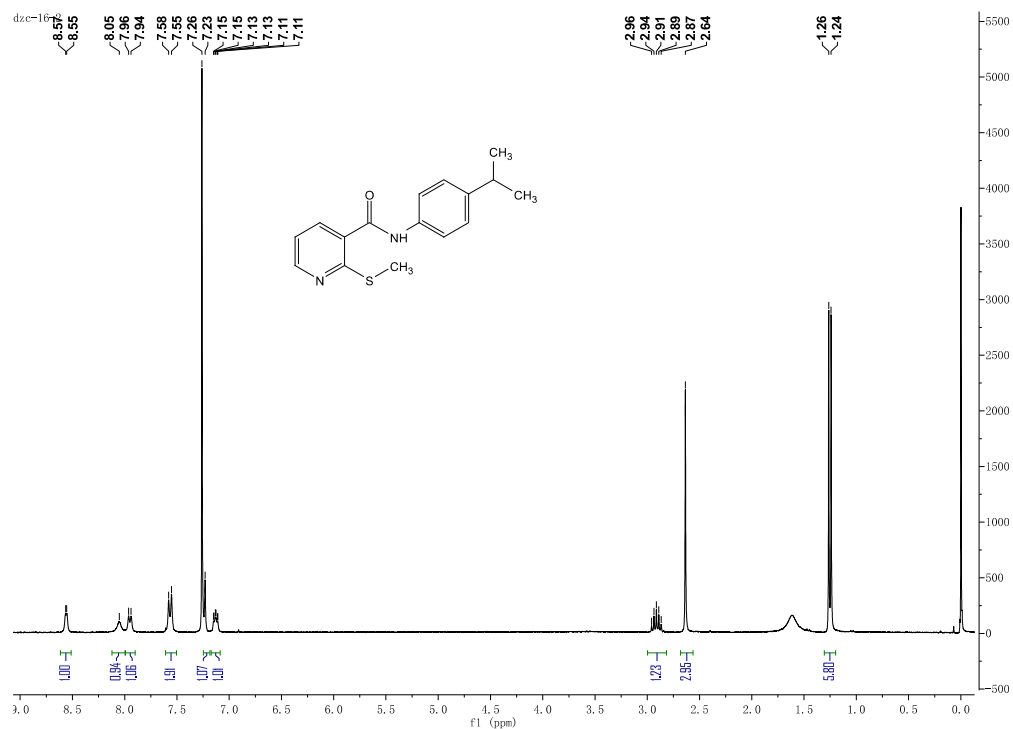

**<sup>1</sup>H NMR spectra of 16c**

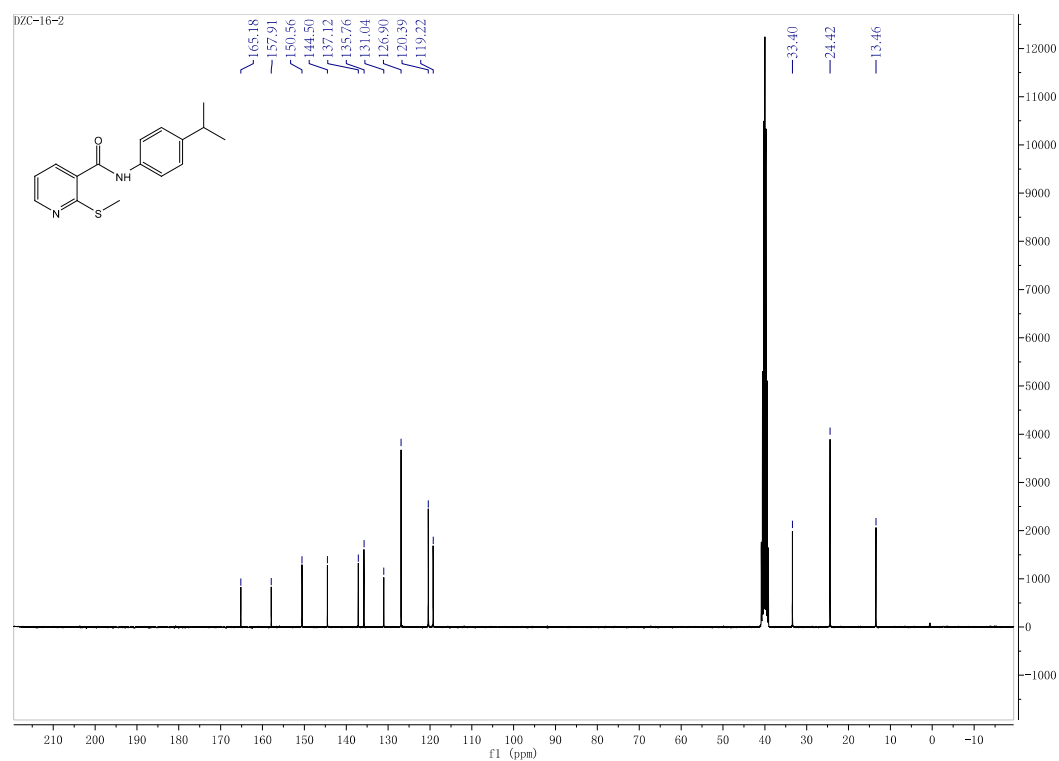

**<sup>13</sup>C NMR spectra of 16c**

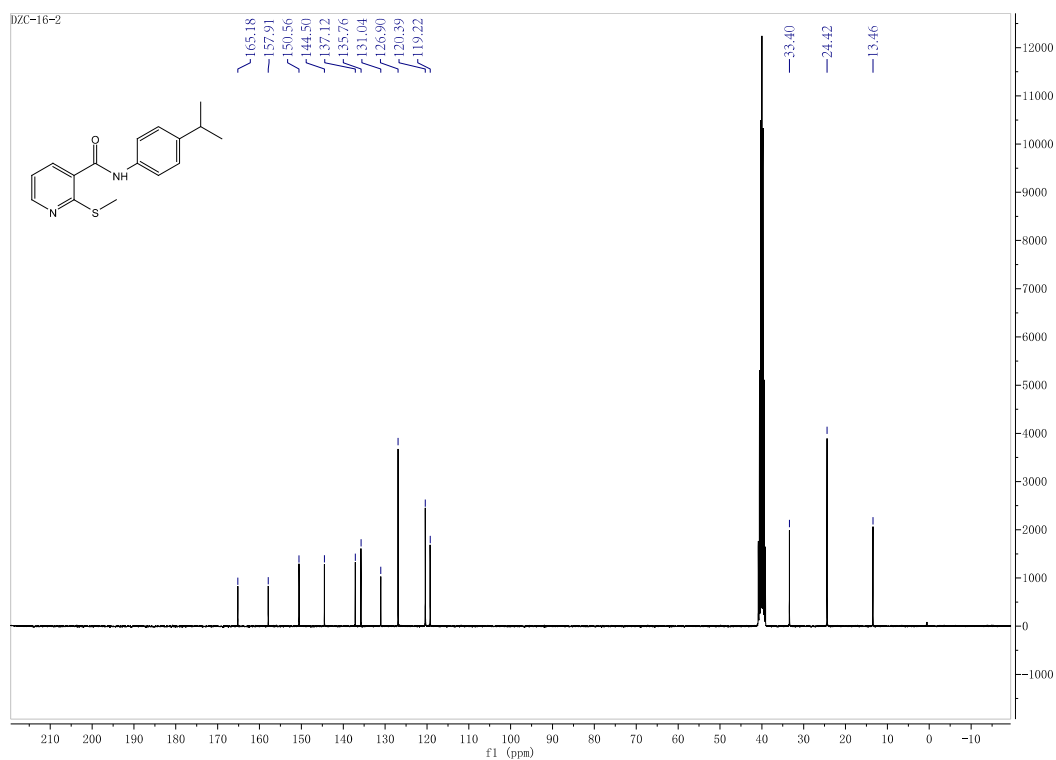

**<sup>13</sup>C NMR spectra of 16c**

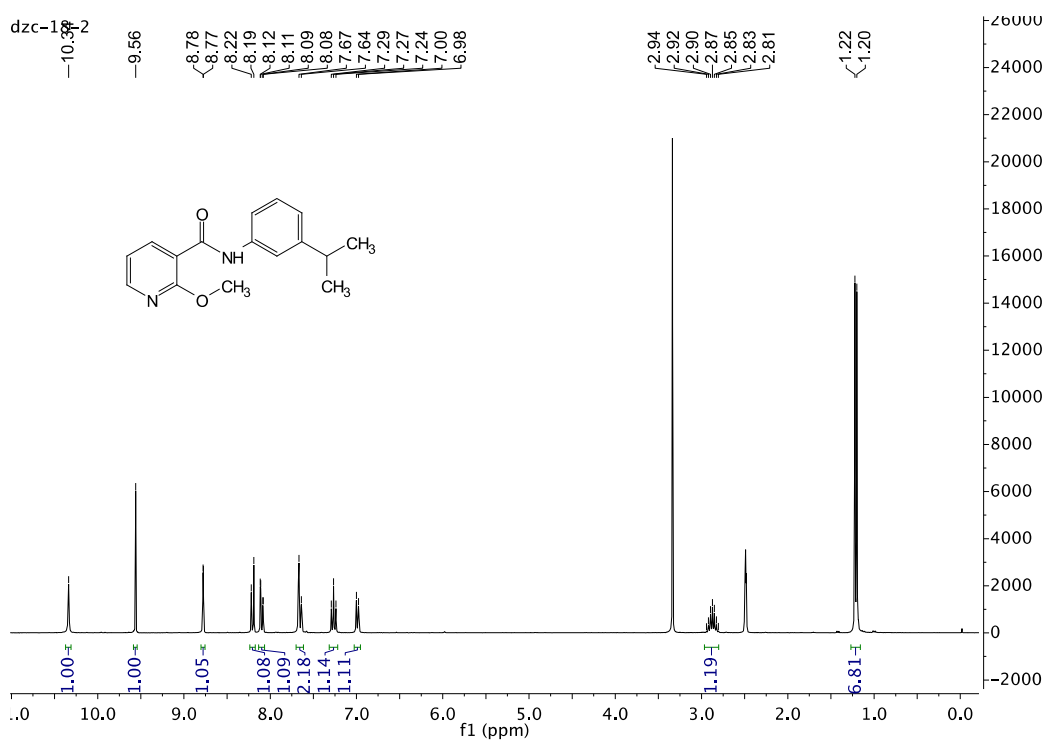

**<sup>1</sup>H NMR spectra of 16d**

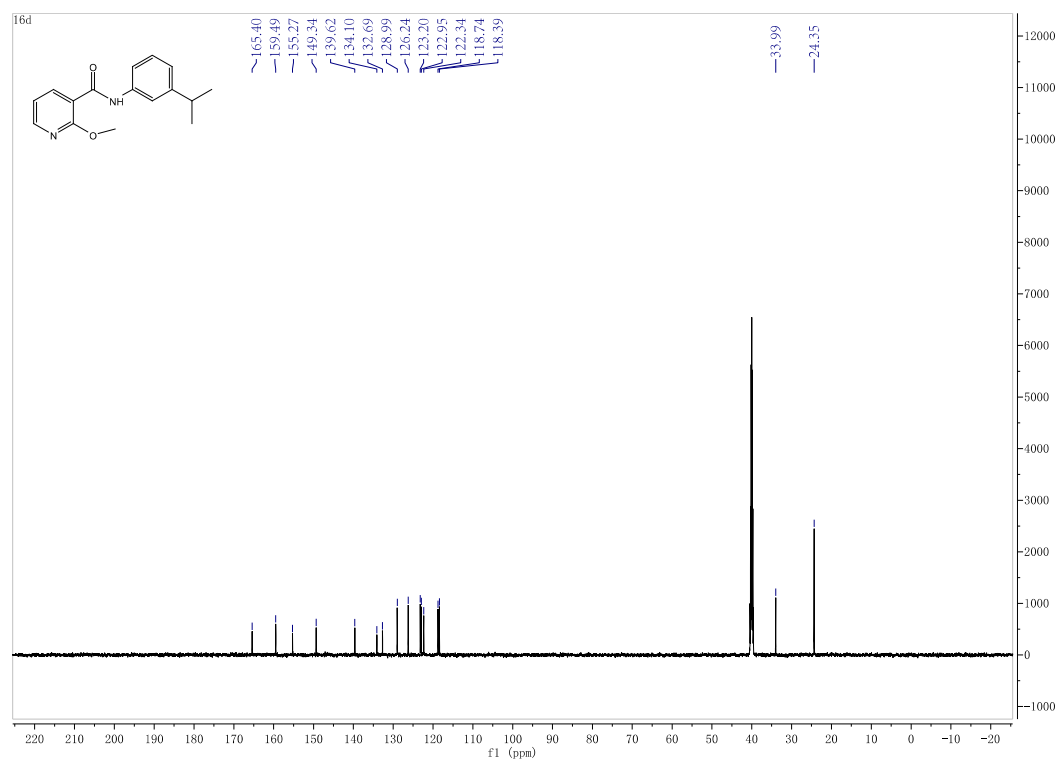

### <sup>13</sup>C NMR spectra of 16d

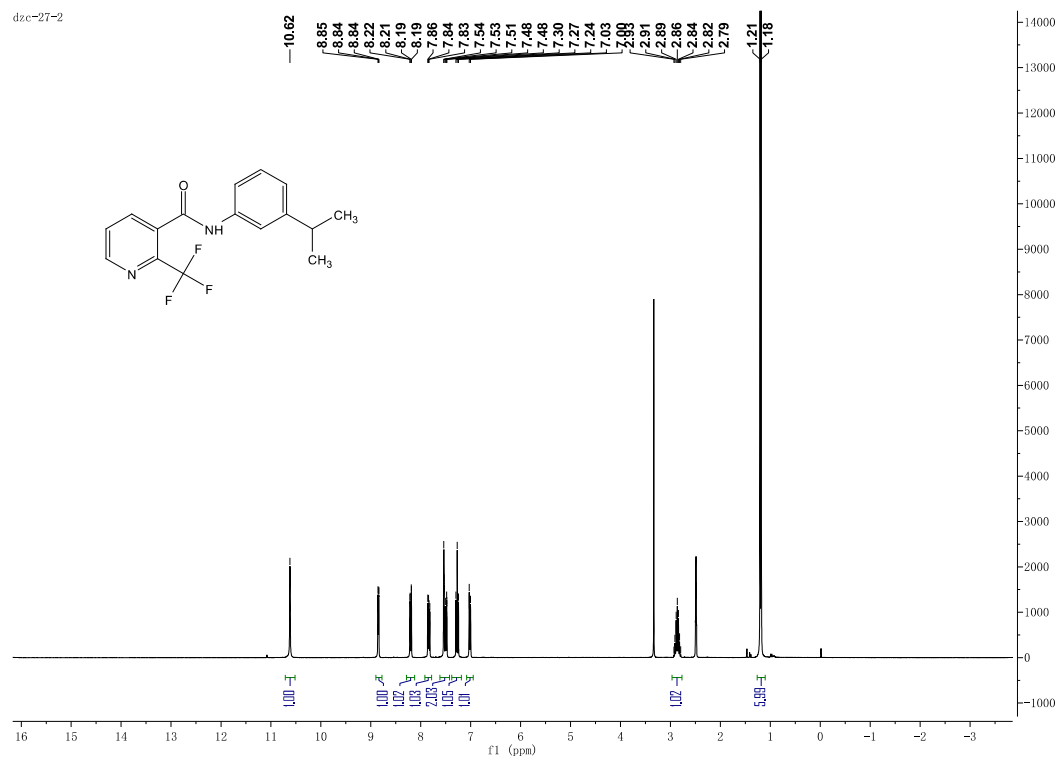

### <sup>1</sup>H NMR spectra of 16e



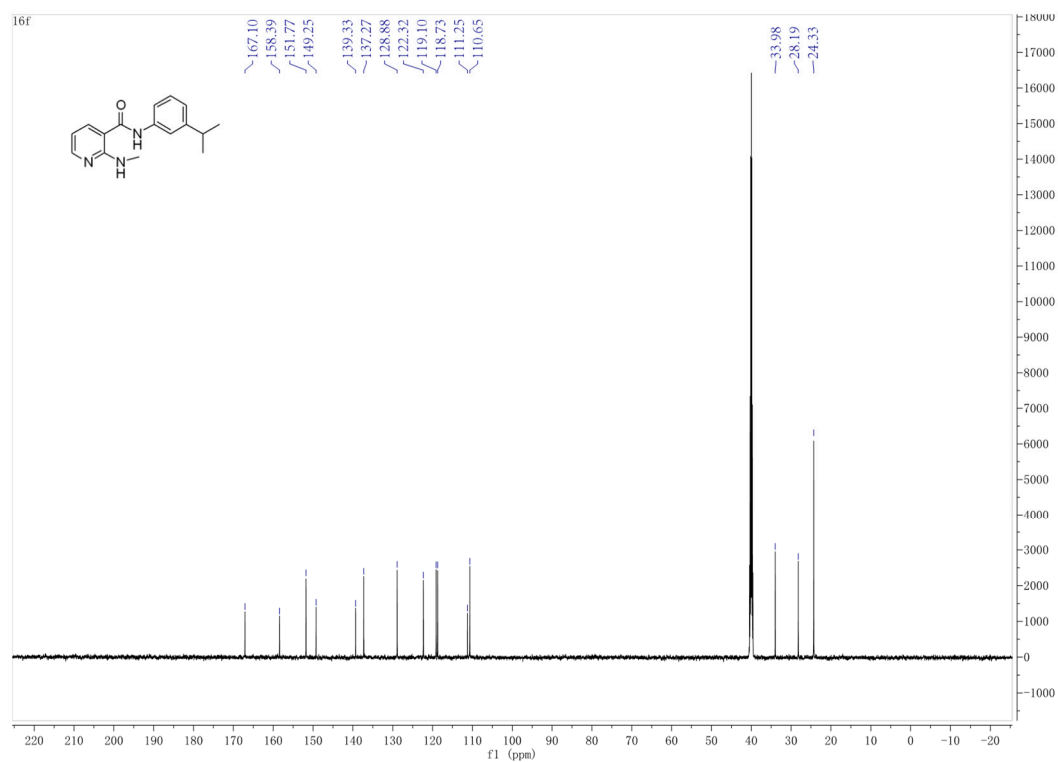

**$^{13}\text{C}$  NMR spectra of 16f**

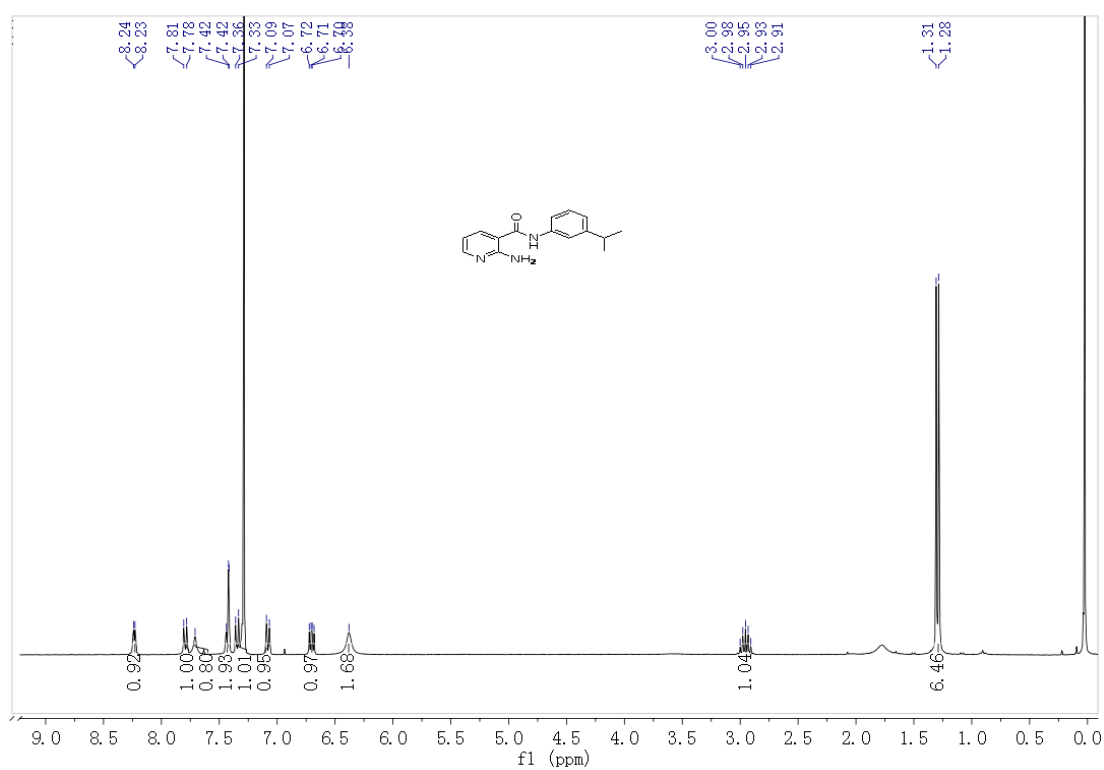

**$^1\text{H}$  NMR spectra of 16g**



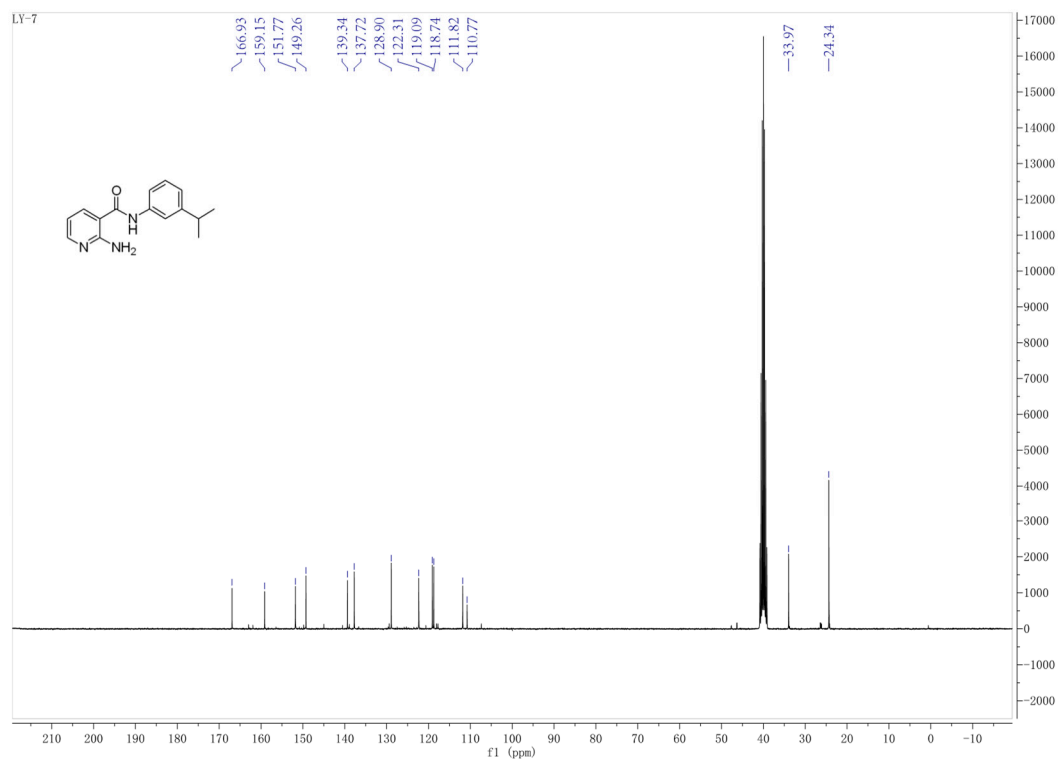

**$^{13}\text{C}$  NMR spectra of 16g**

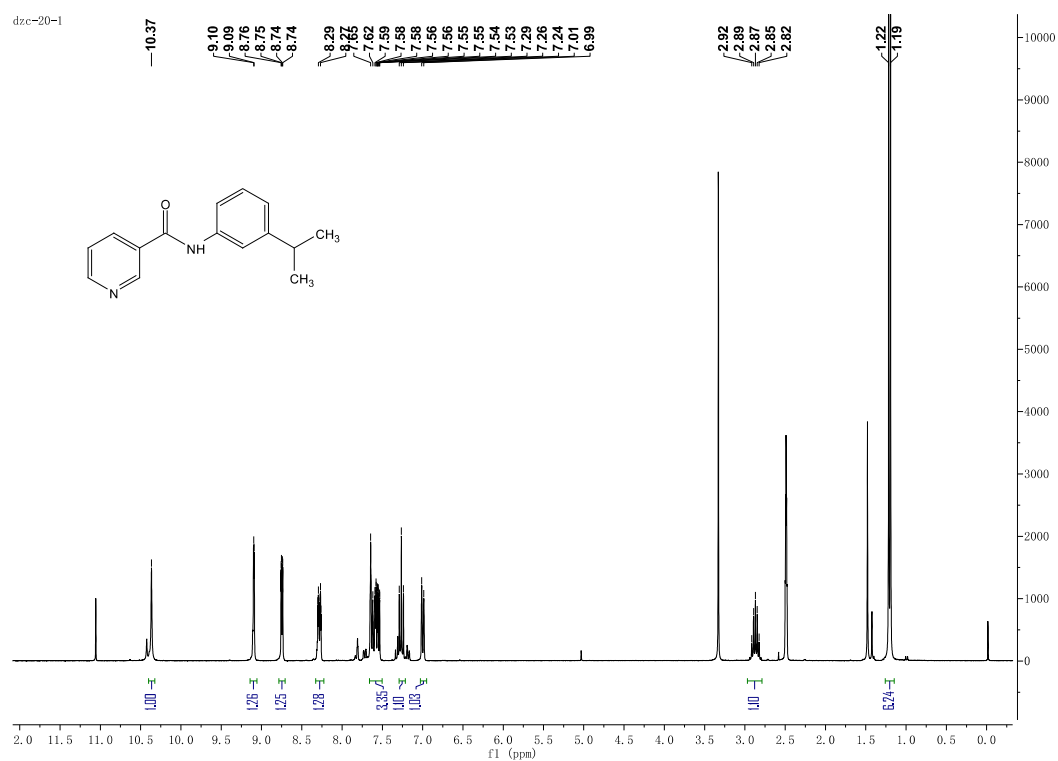

**$^1\text{H}$  NMR spectra of 16h**

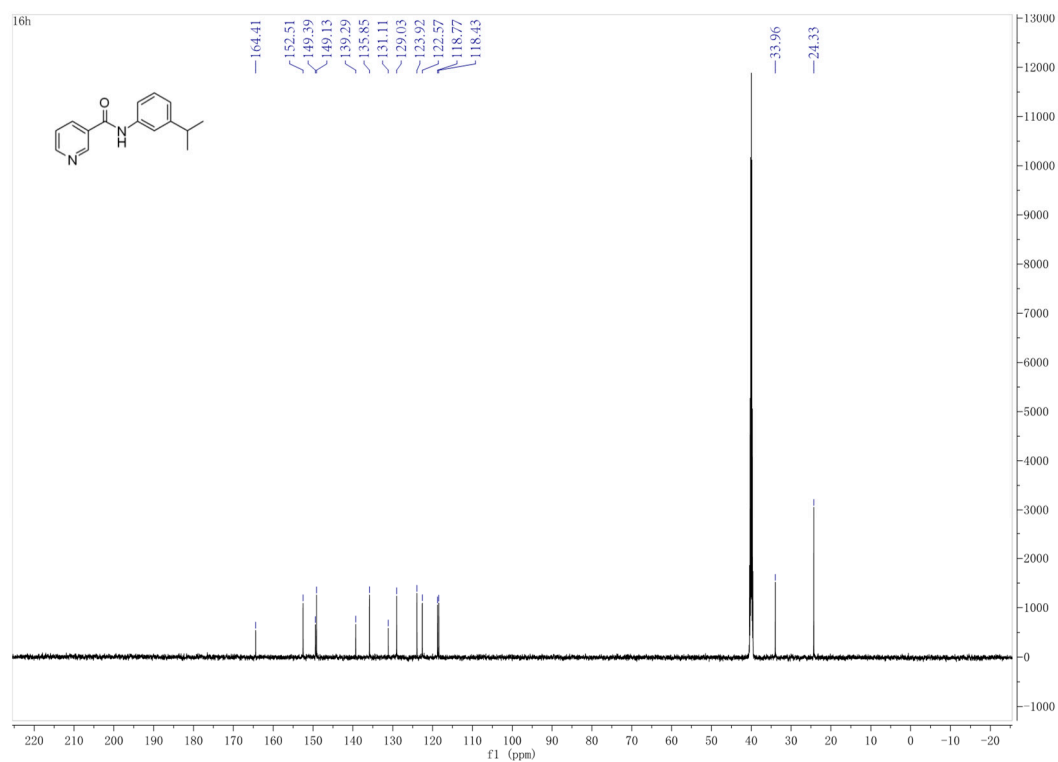

**$^{13}\text{C}$  NMR spectra of 16h**

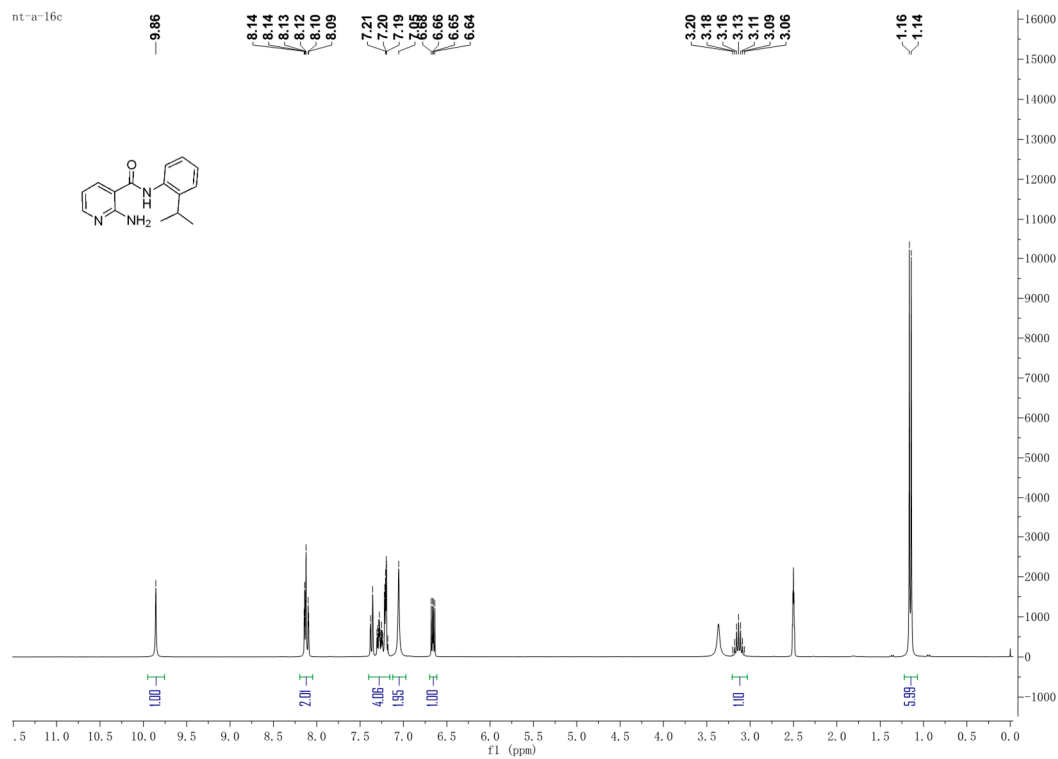

**$^1\text{H}$  NMR spectra of 16i**



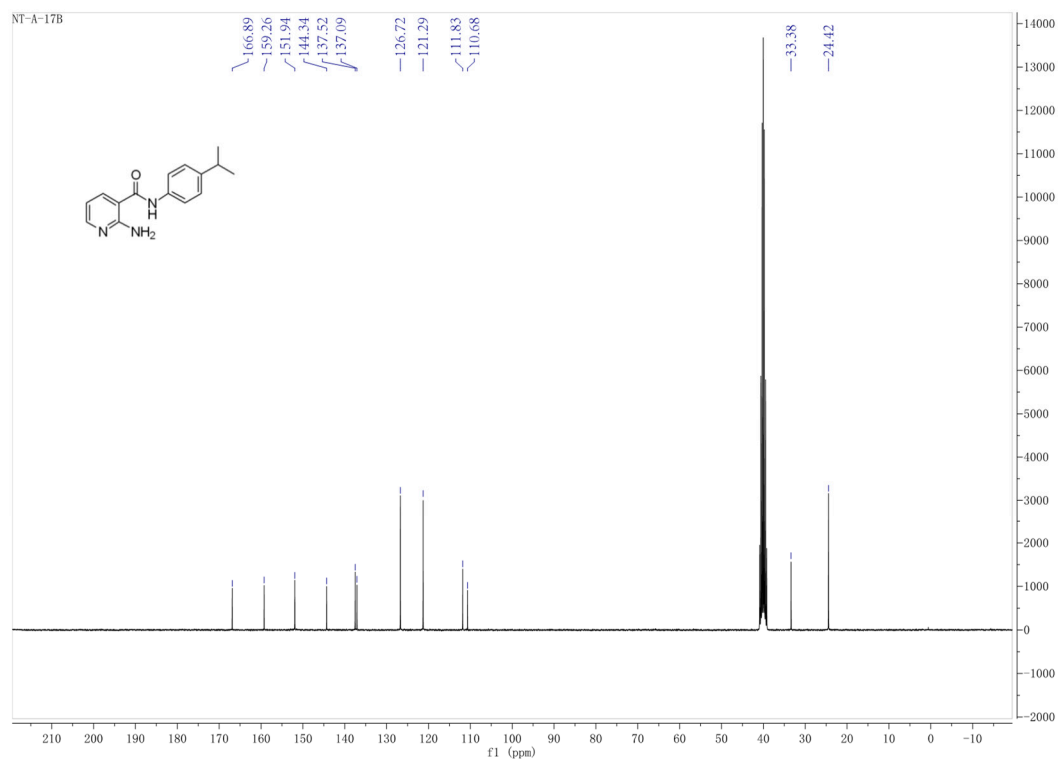

### <sup>13</sup>C NMR spectra of 16j

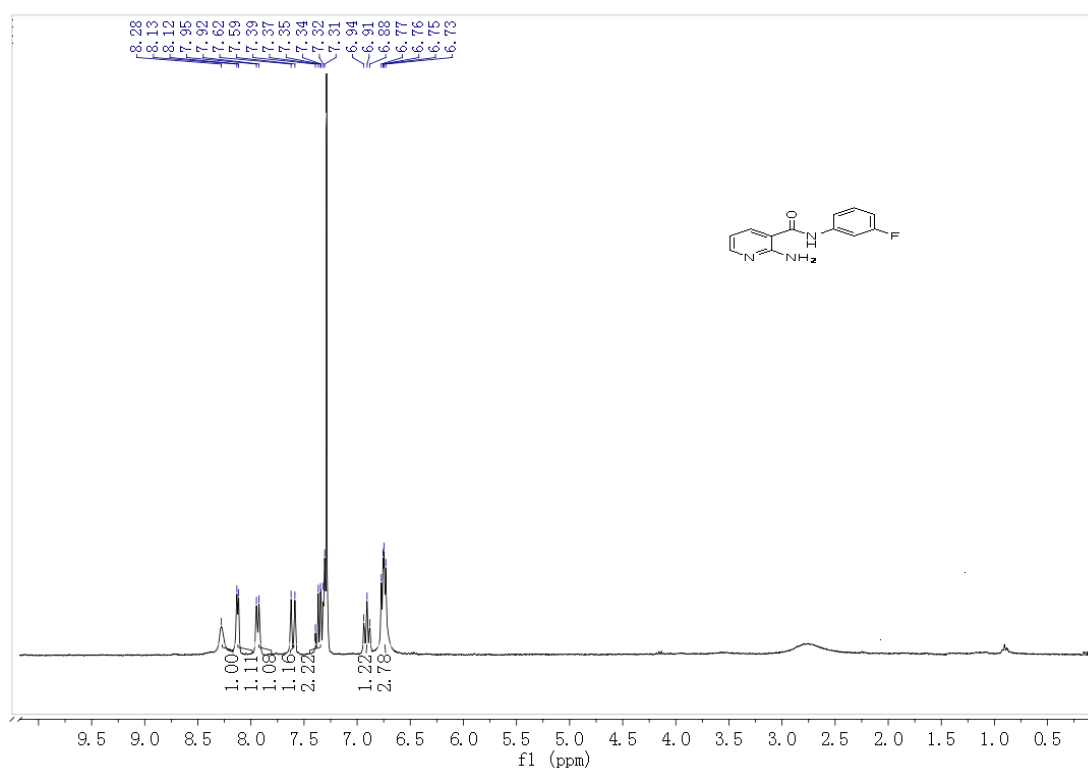

### <sup>1</sup>H NMR spectra of 16k

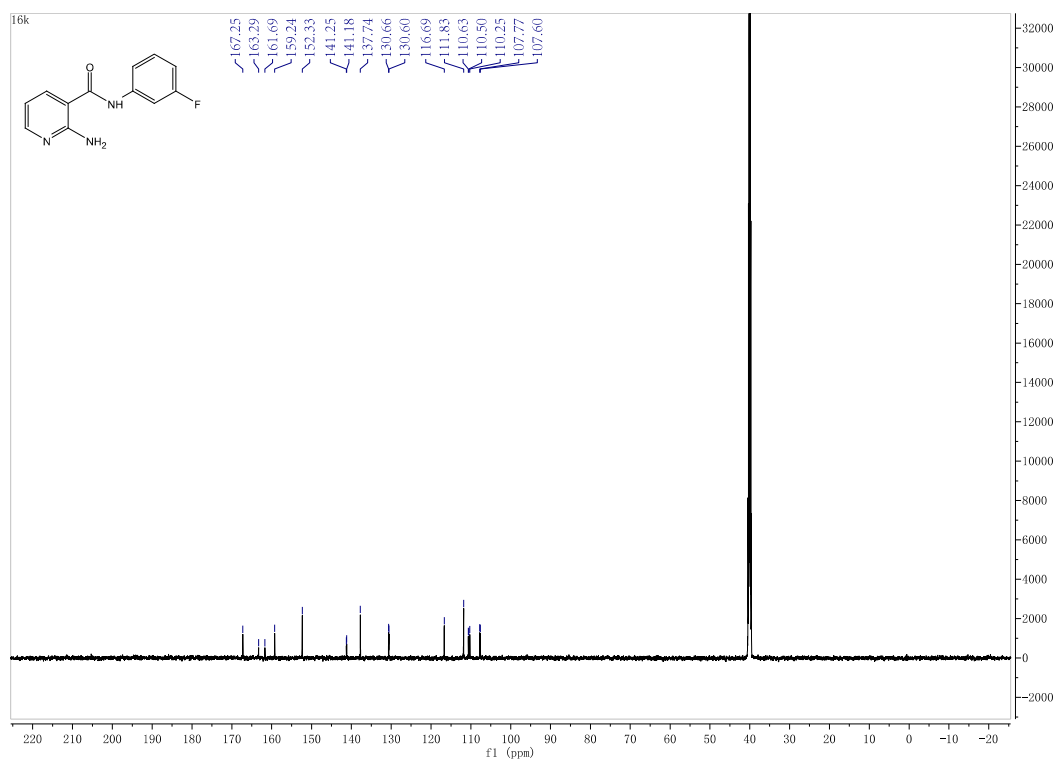

**$^{13}\text{C}$  NMR spectra of 16k**

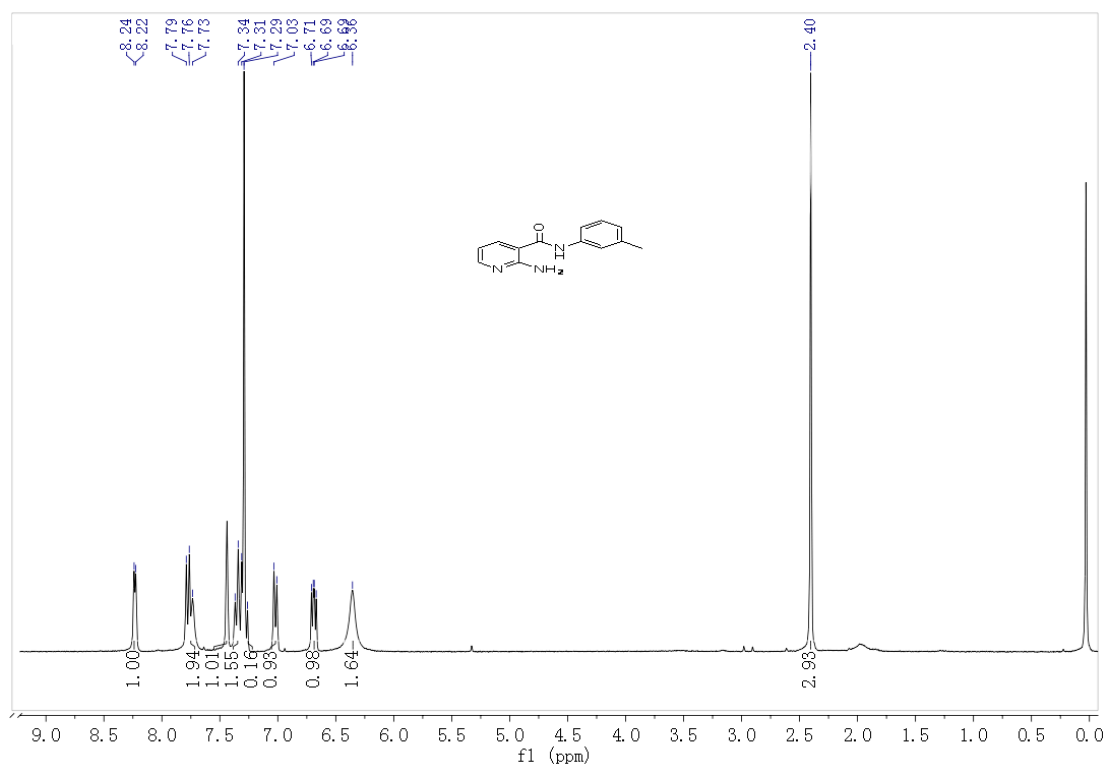

**$^1\text{H}$  NMR spectra of 16l**

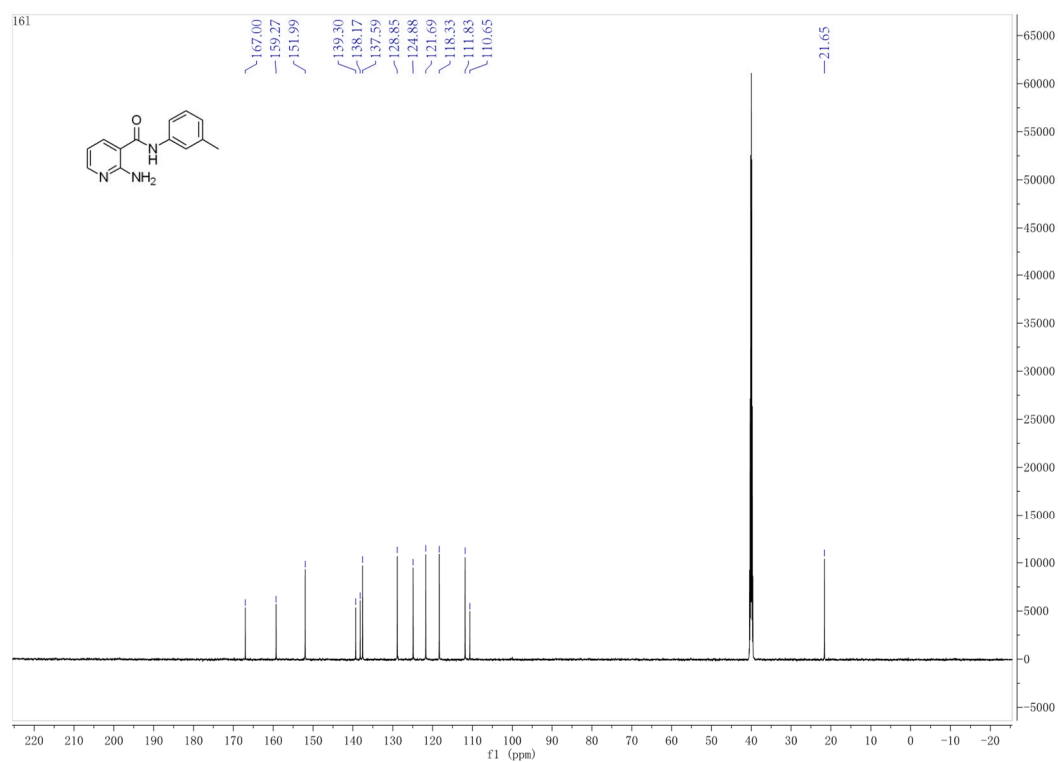

**$^{13}\text{C}$  NMR spectra of 16l**

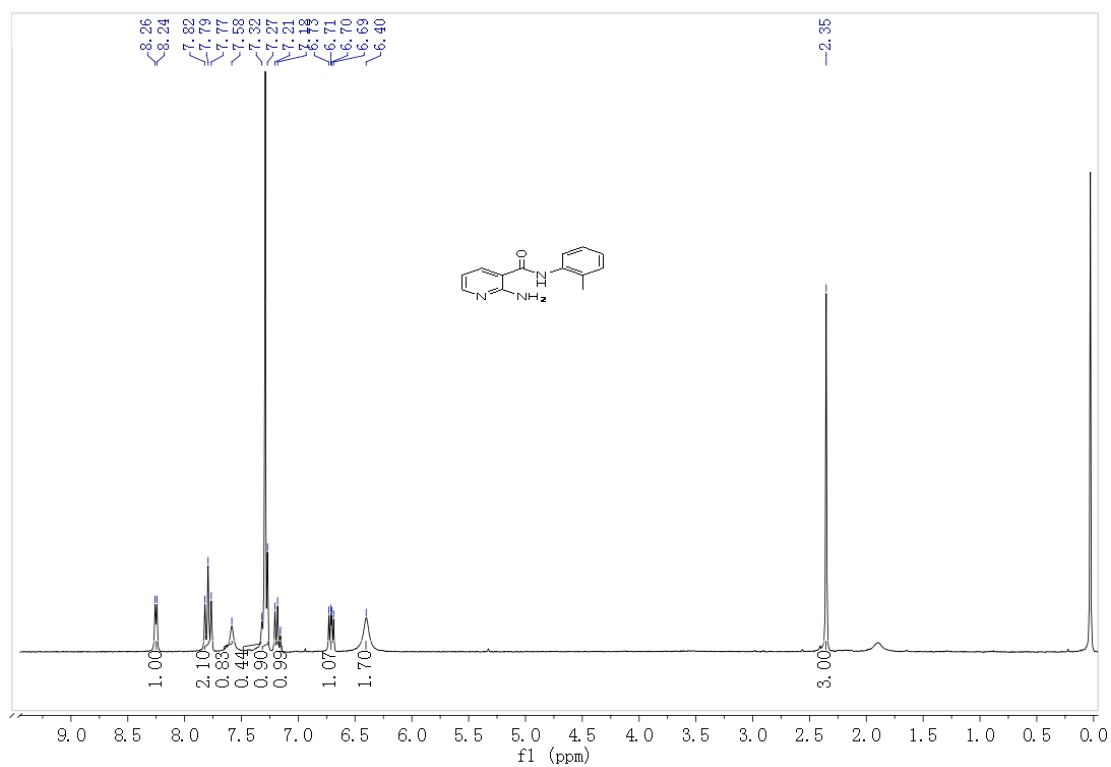

**$^1\text{H}$  NMR spectra of 16m**

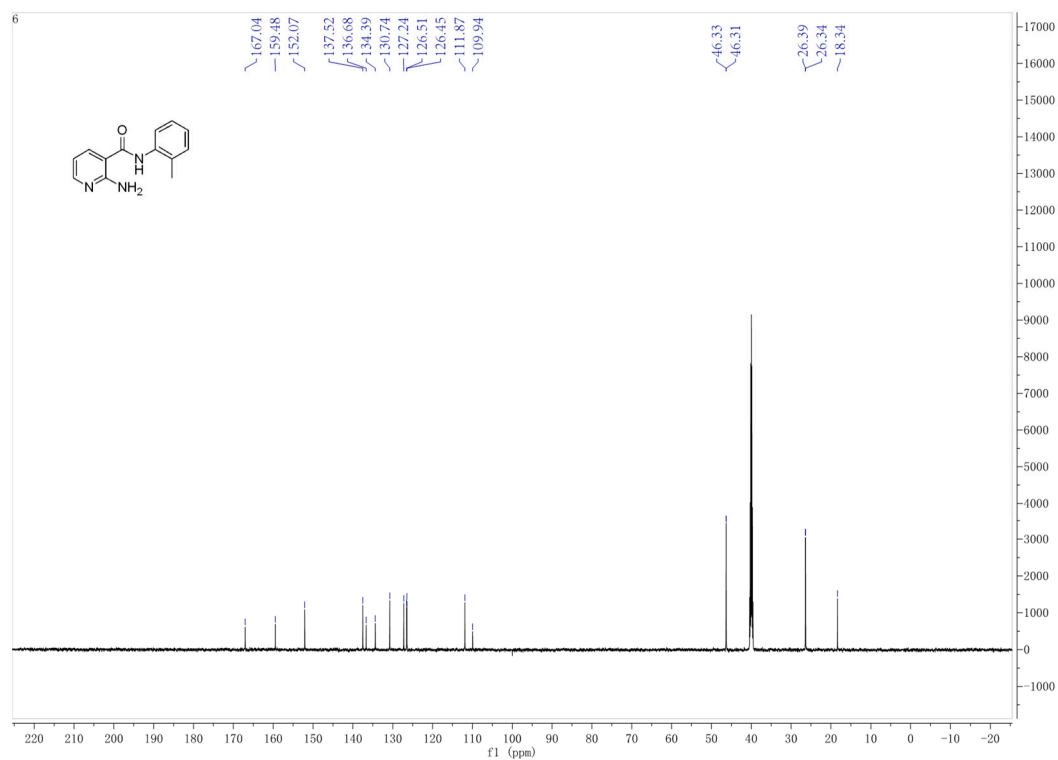

**$^{13}\text{C}$  NMR spectra of 16m**

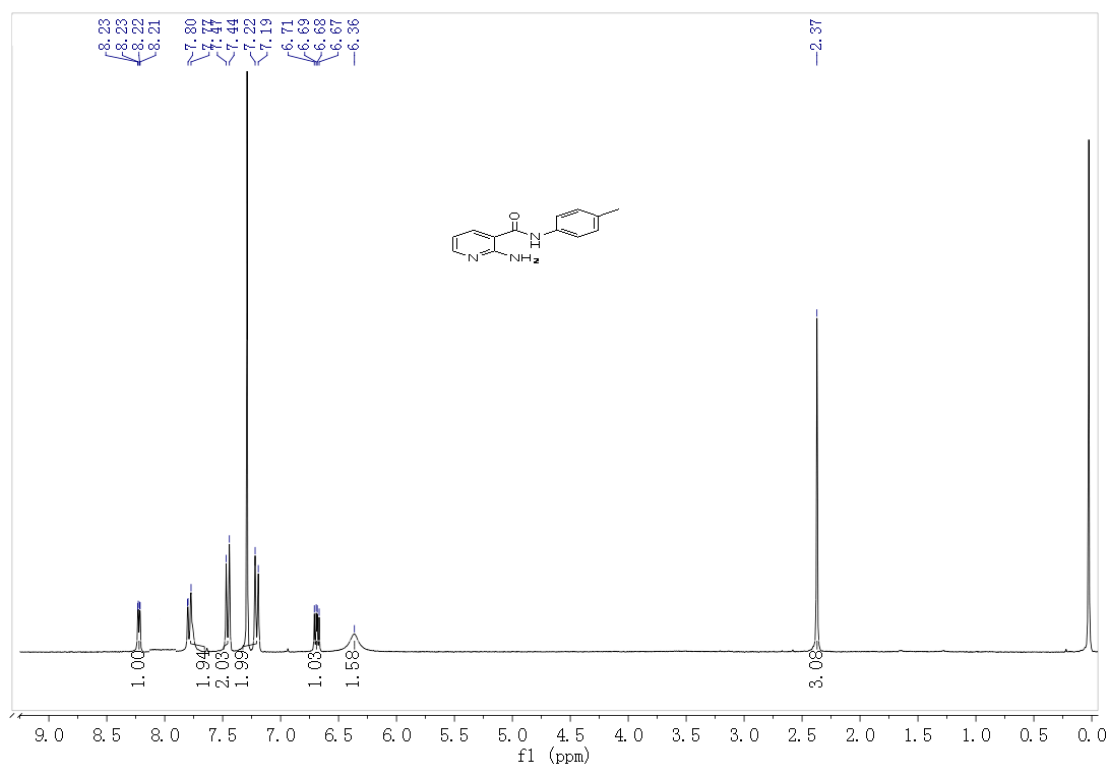

**$^1\text{H}$  NMR spectra of 16n**

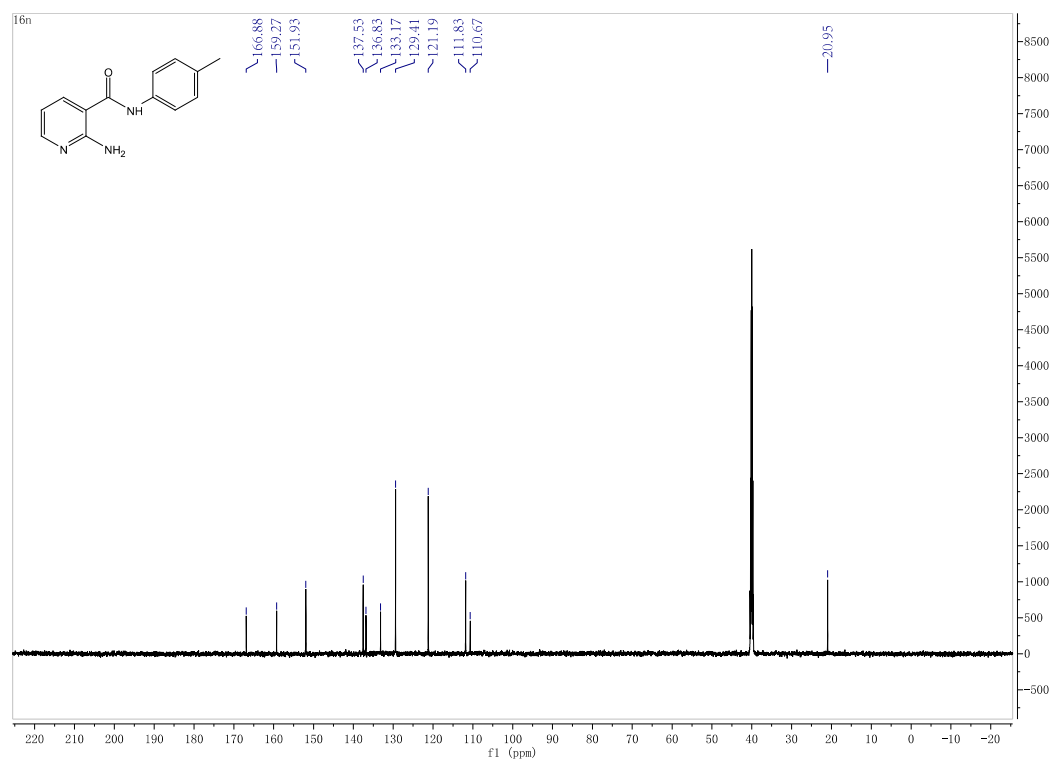

**<sup>13</sup>C NMR spectra of 16n**

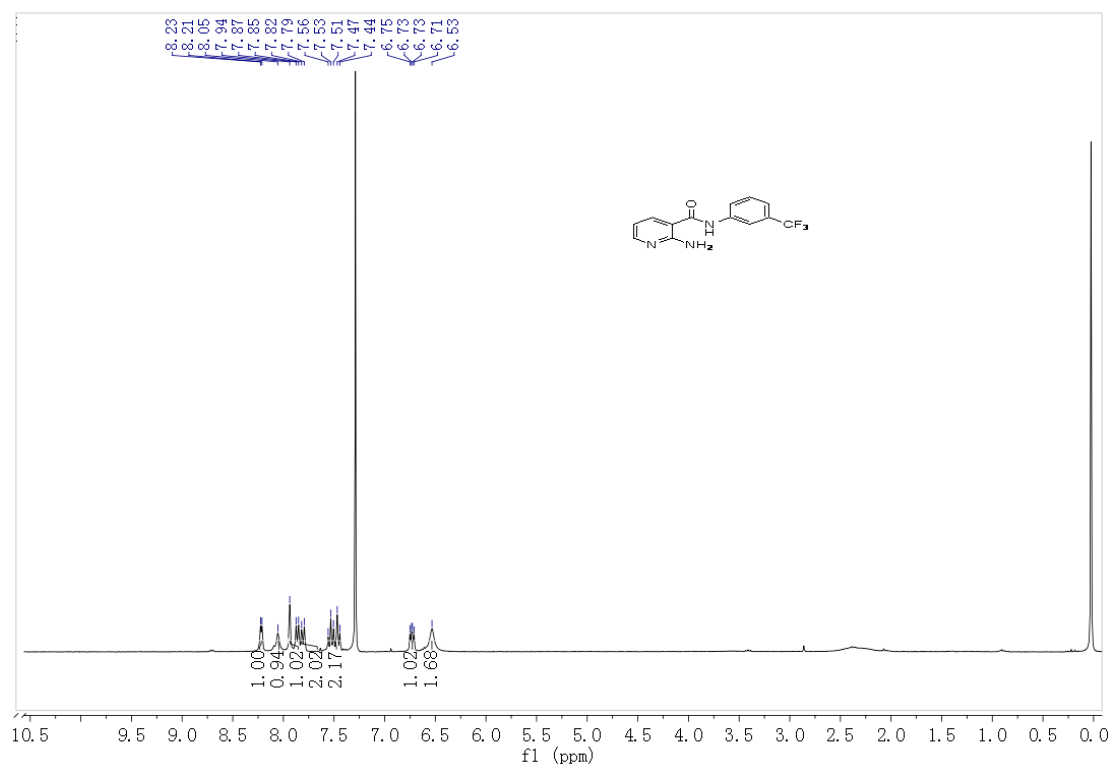

**<sup>1</sup>H NMR spectra of 16o**



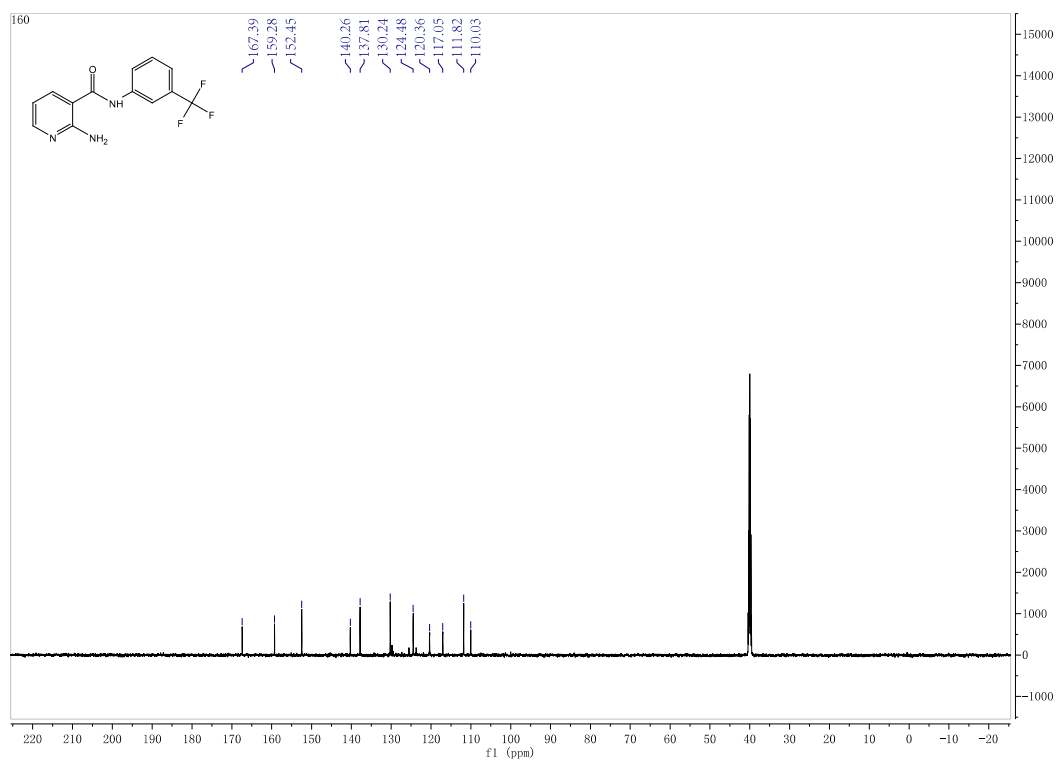

**<sup>13</sup>C NMR spectra of 16o**

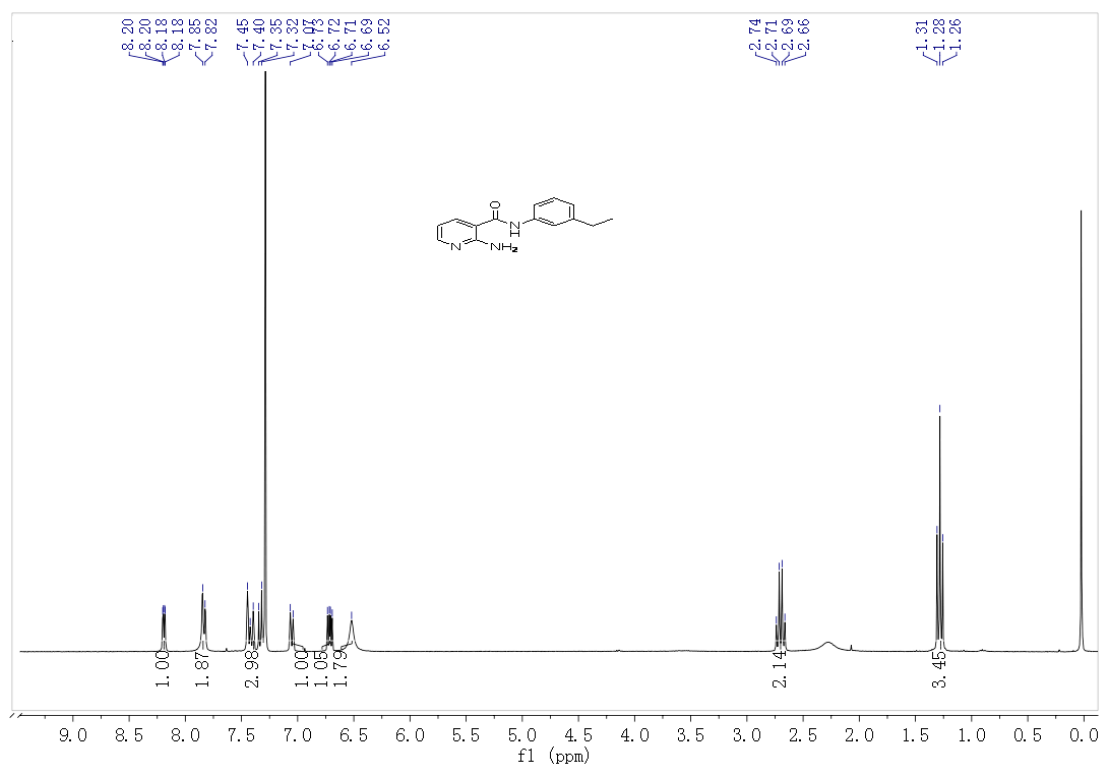

**<sup>1</sup>H NMR spectra of 16p**

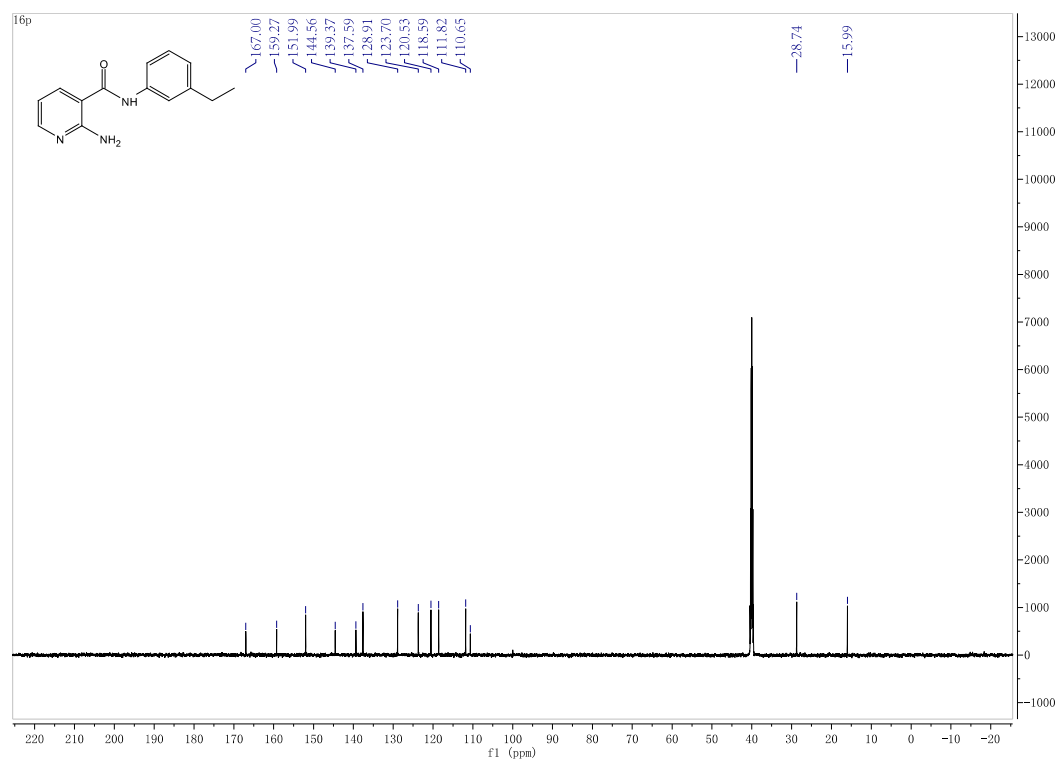

**<sup>13</sup>C NMR spectra of 16p**

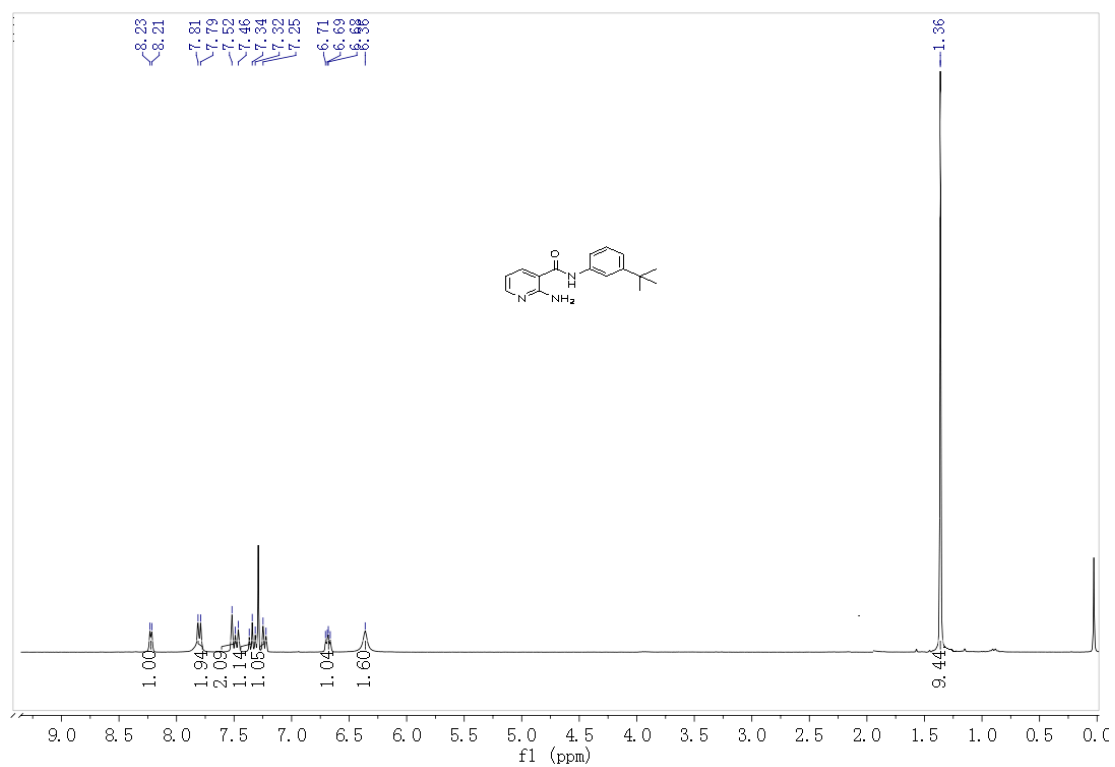

**<sup>1</sup>H NMR spectra of 16q**

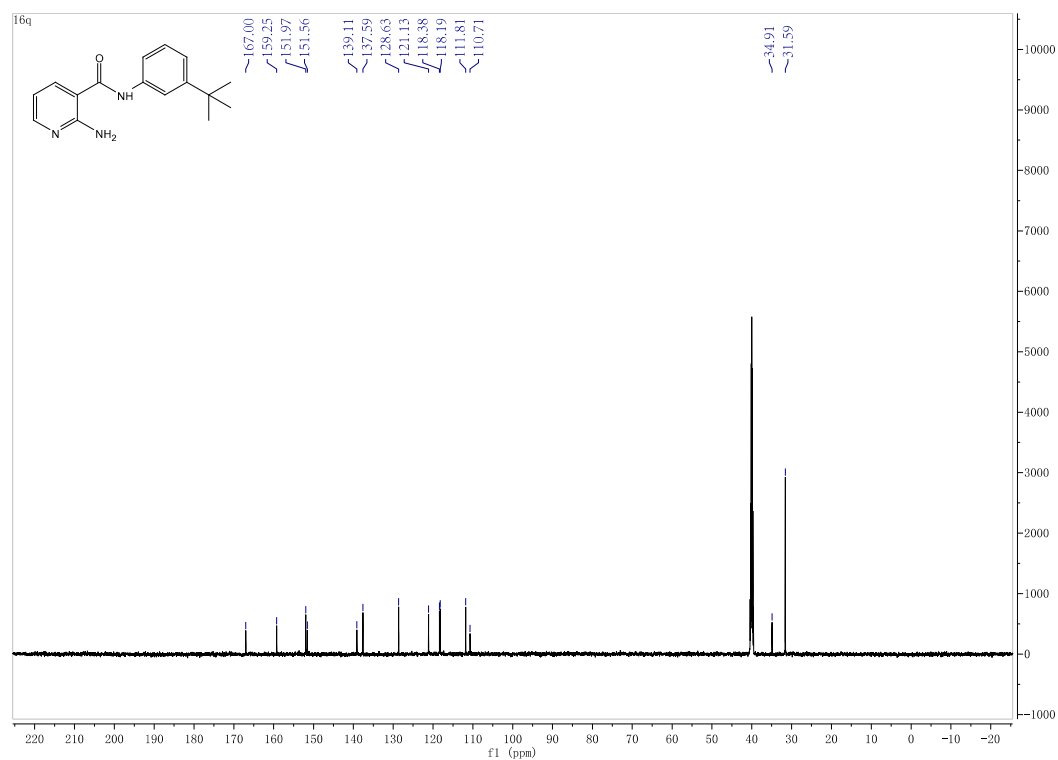

**<sup>13</sup>C NMR spectra of 16q**

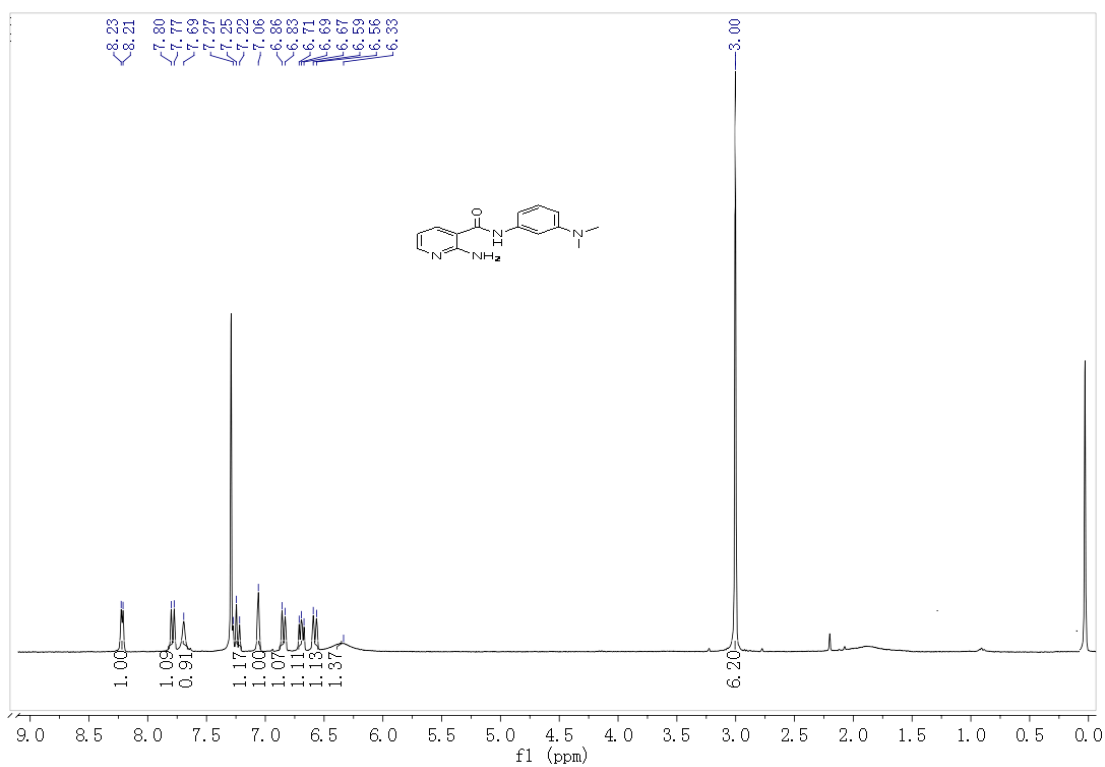

**<sup>1</sup>H NMR spectra of 16r**

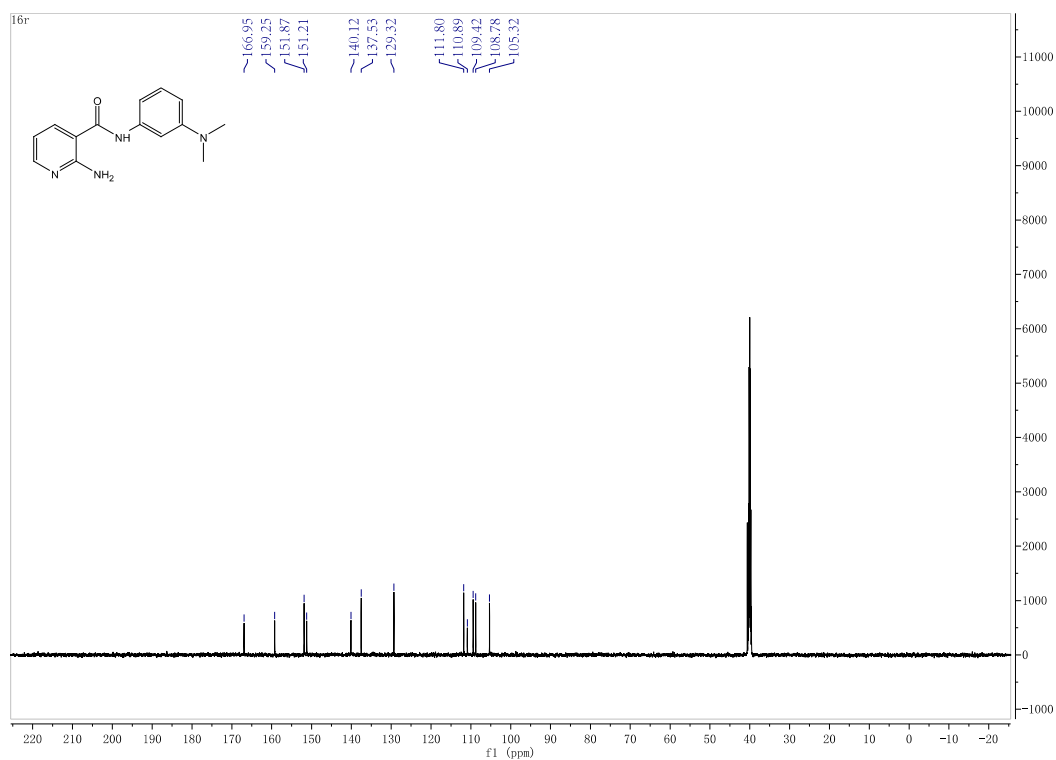

**<sup>13</sup>C NMR spectra of 16r**

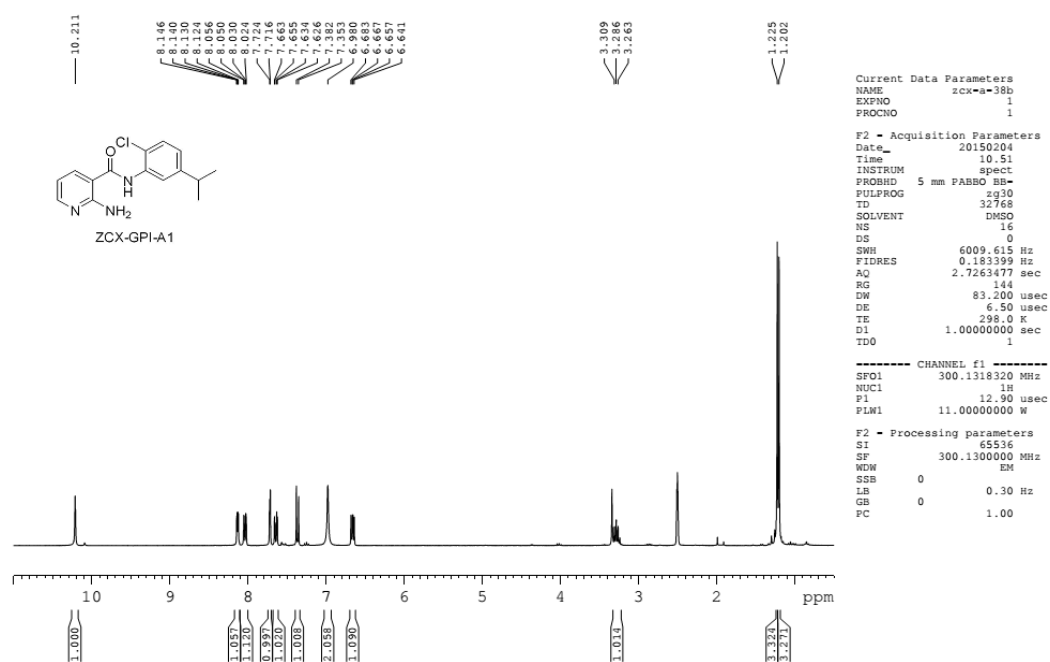

**<sup>1</sup>H NMR spectra of 16s**

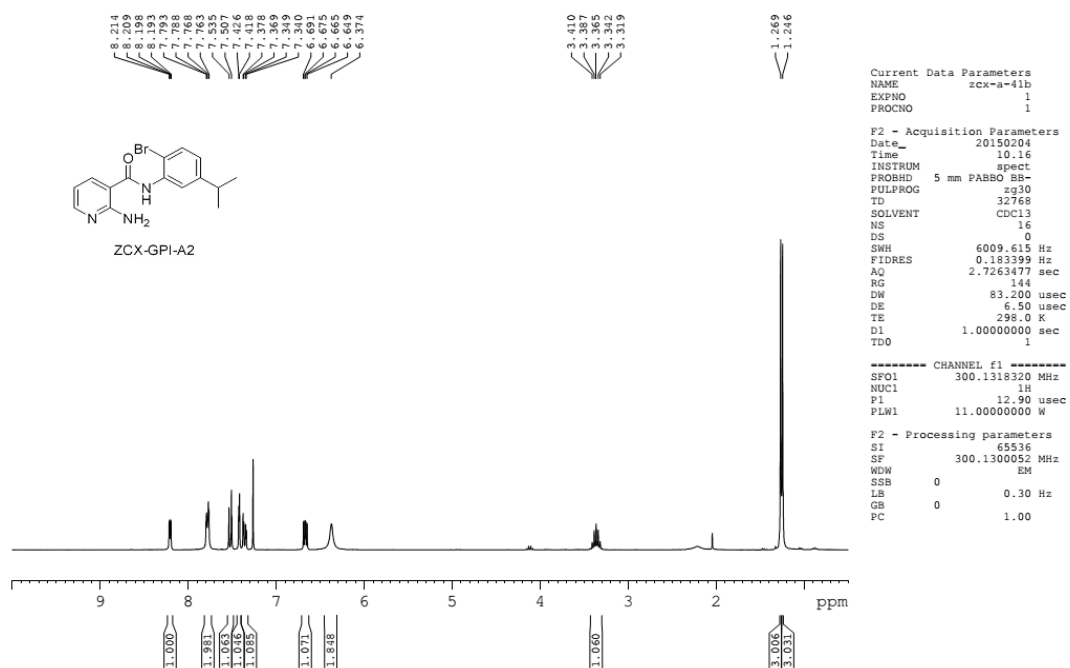

$^1\text{H}$  NMR spectra of 16t

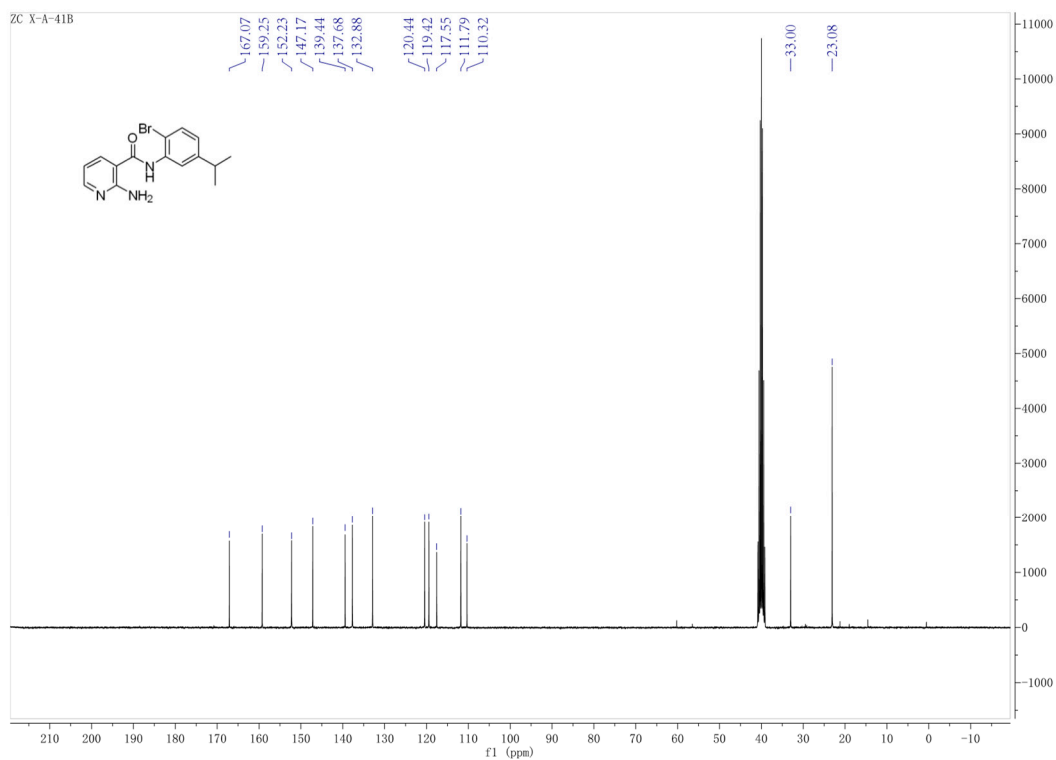

$^{13}\text{C}$  NMR spectra of 16t

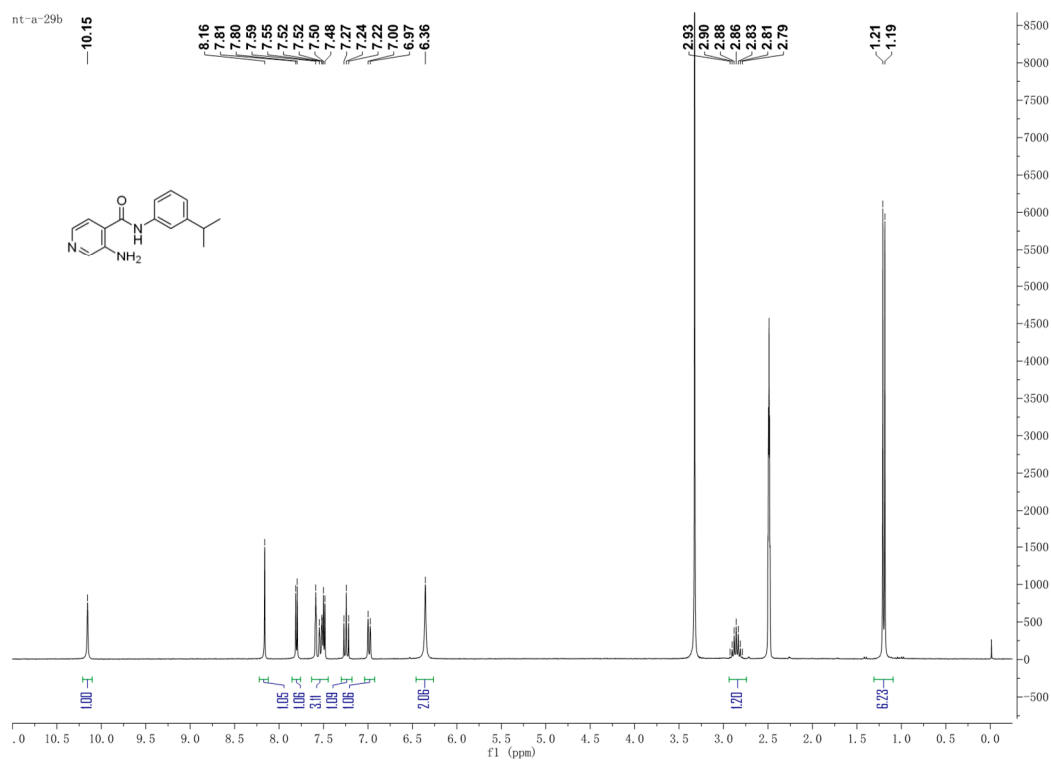

**<sup>1</sup>H NMR spectra of 16u**

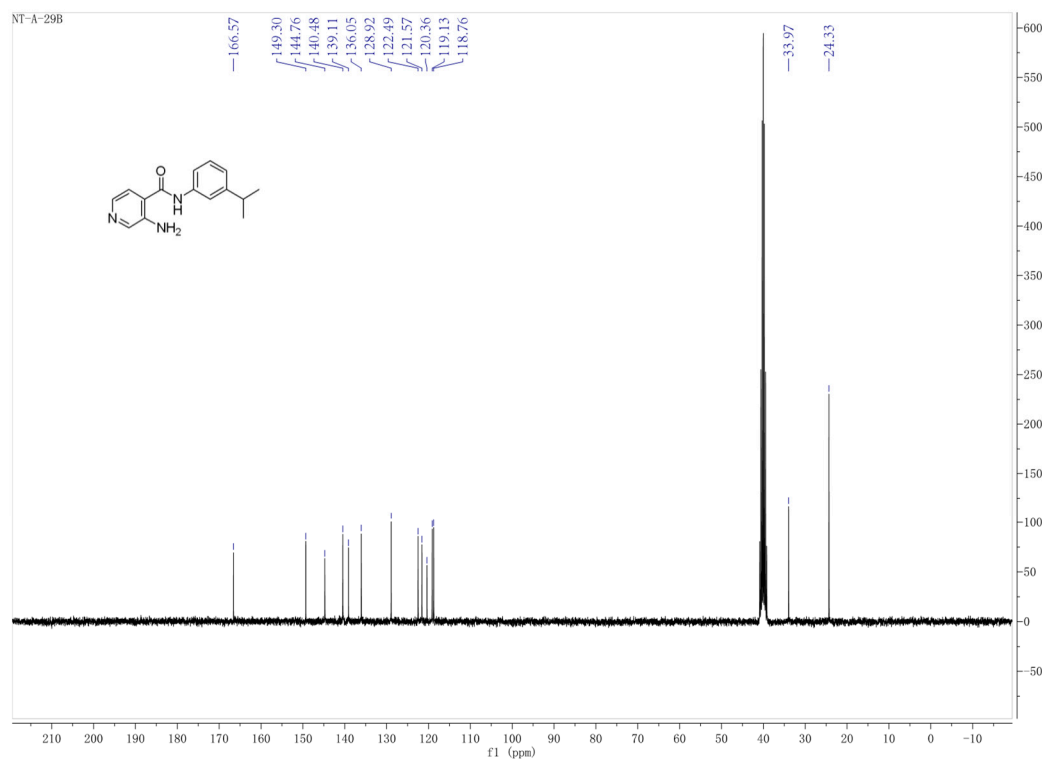

**<sup>13</sup>C NMR spectra of 16u**

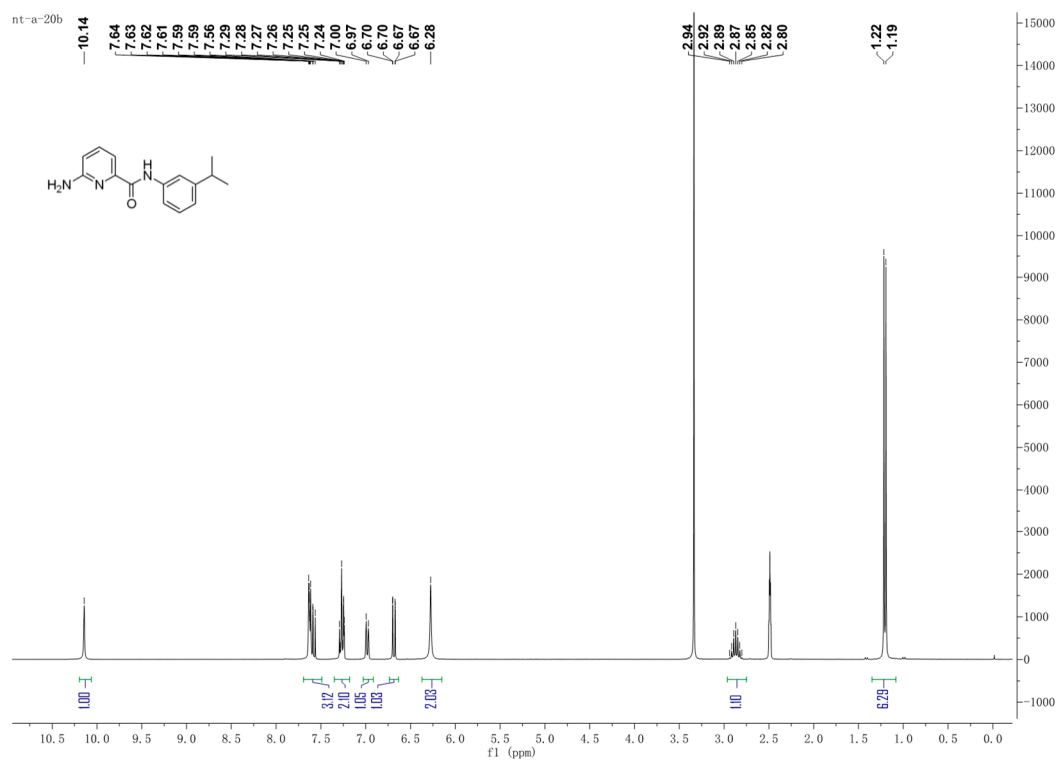

**<sup>1</sup>H NMR spectra of 16v**

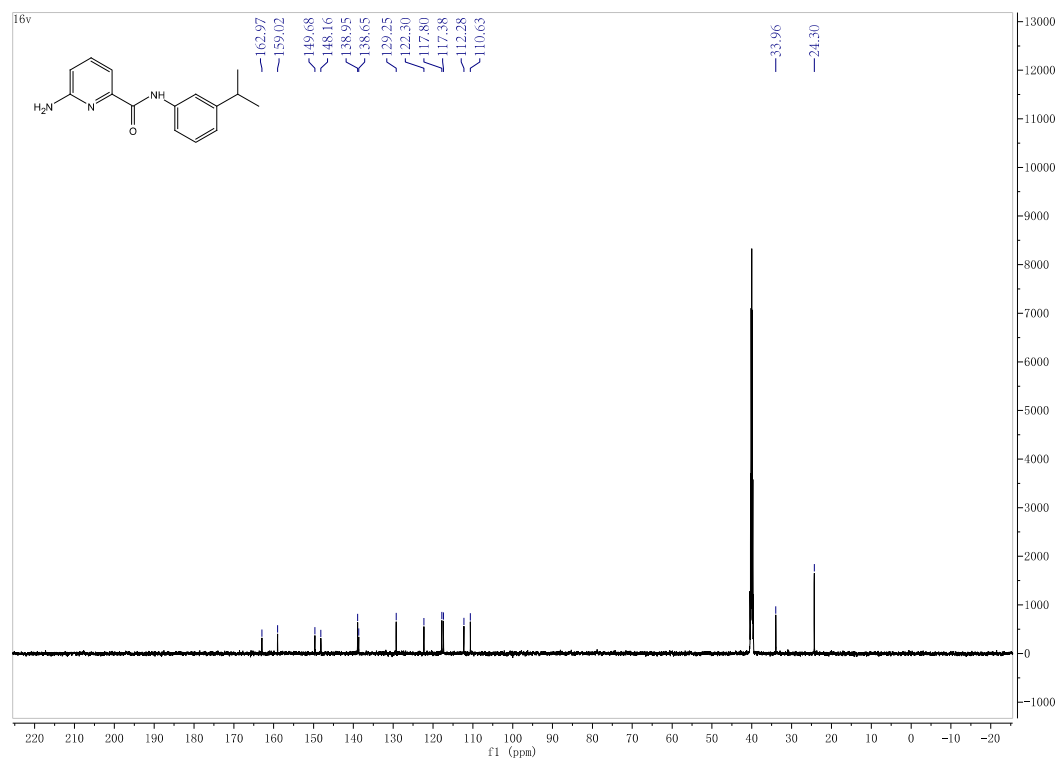

**<sup>13</sup>C NMR spectra of 16v**

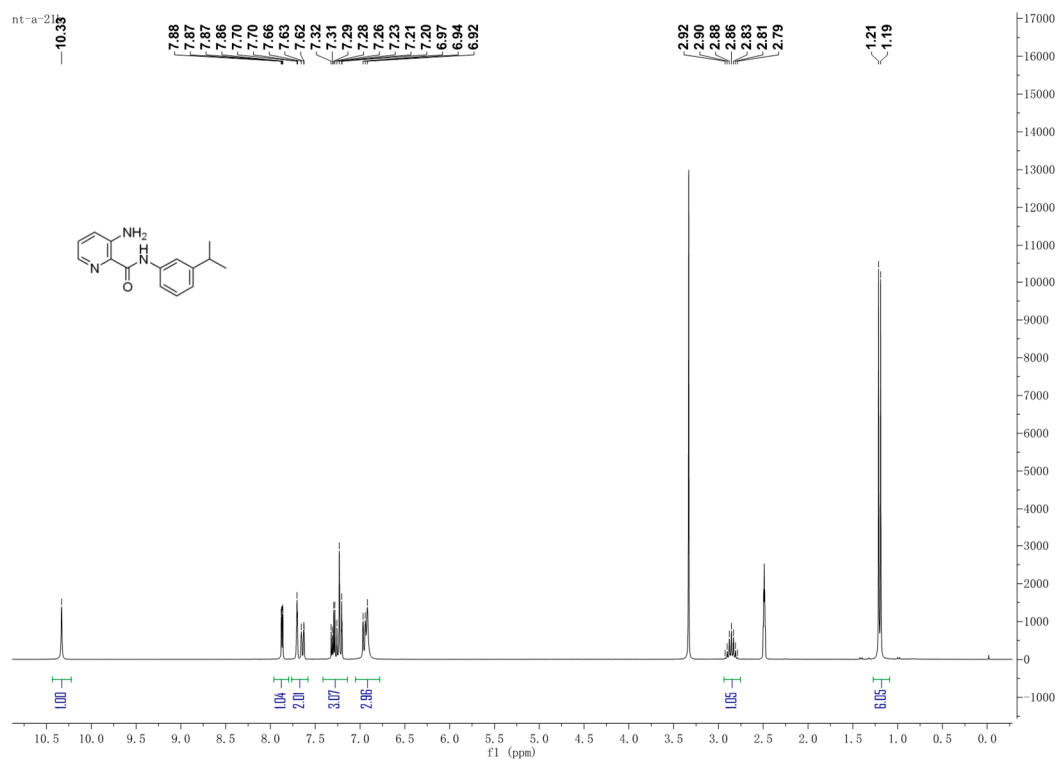

<sup>1</sup>H NMR spectra of 16w

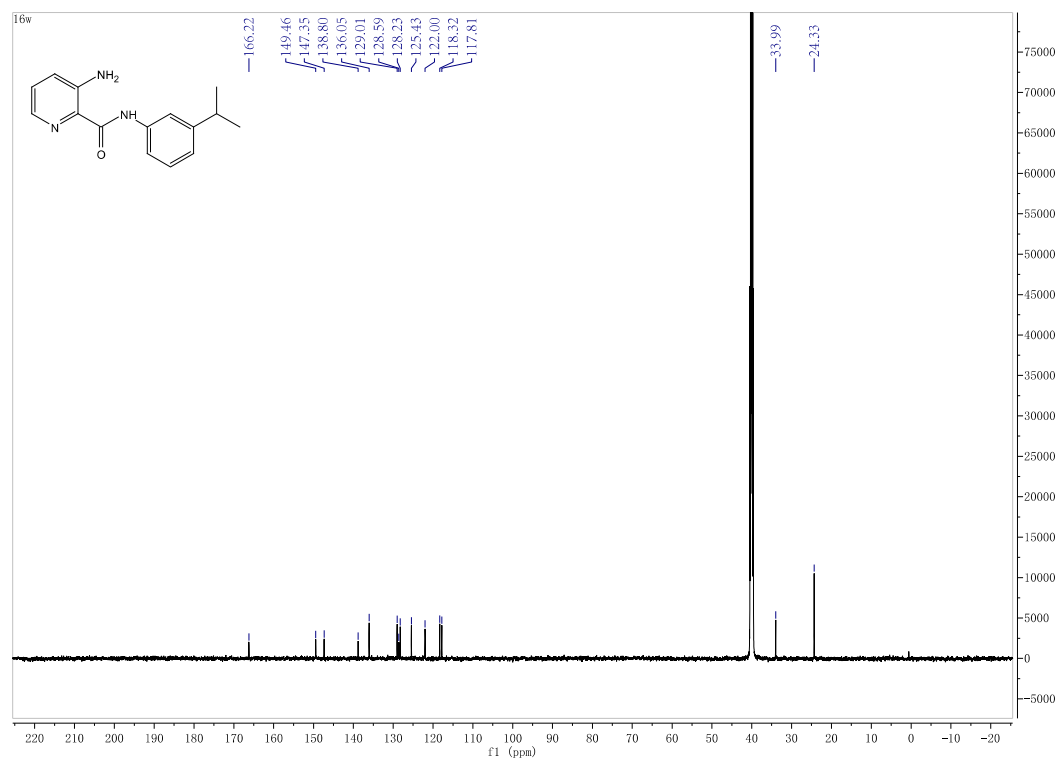

<sup>13</sup>C NMR spectra of 16w



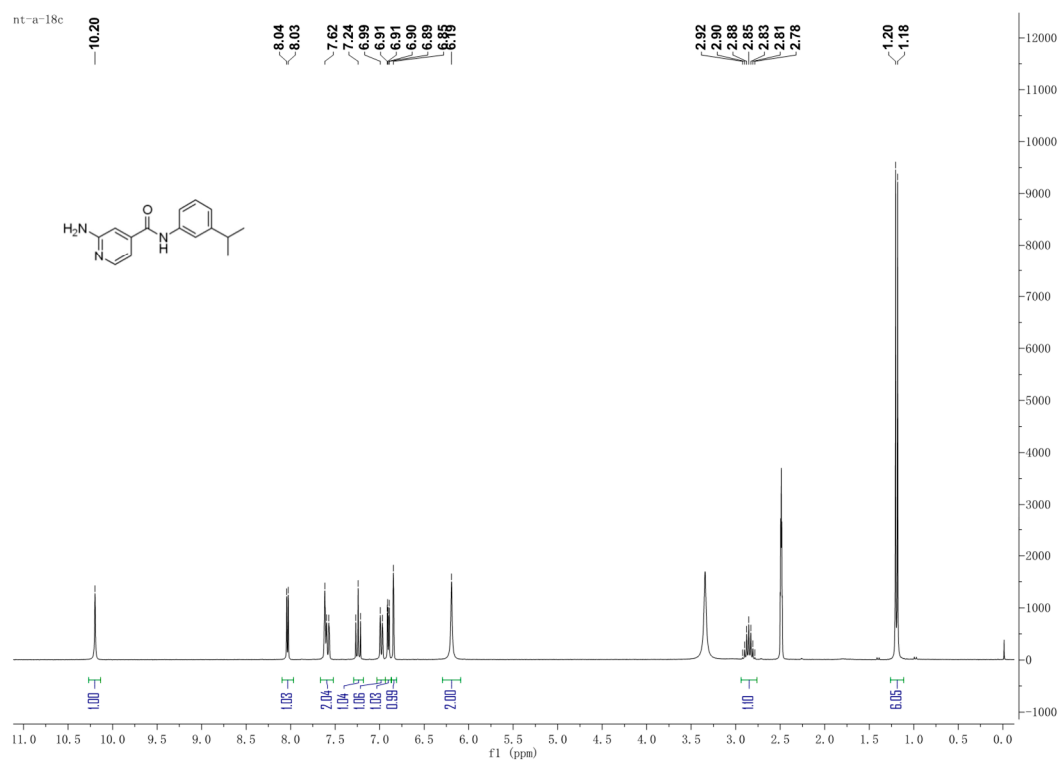

**<sup>1</sup>H NMR spectra of 16x**

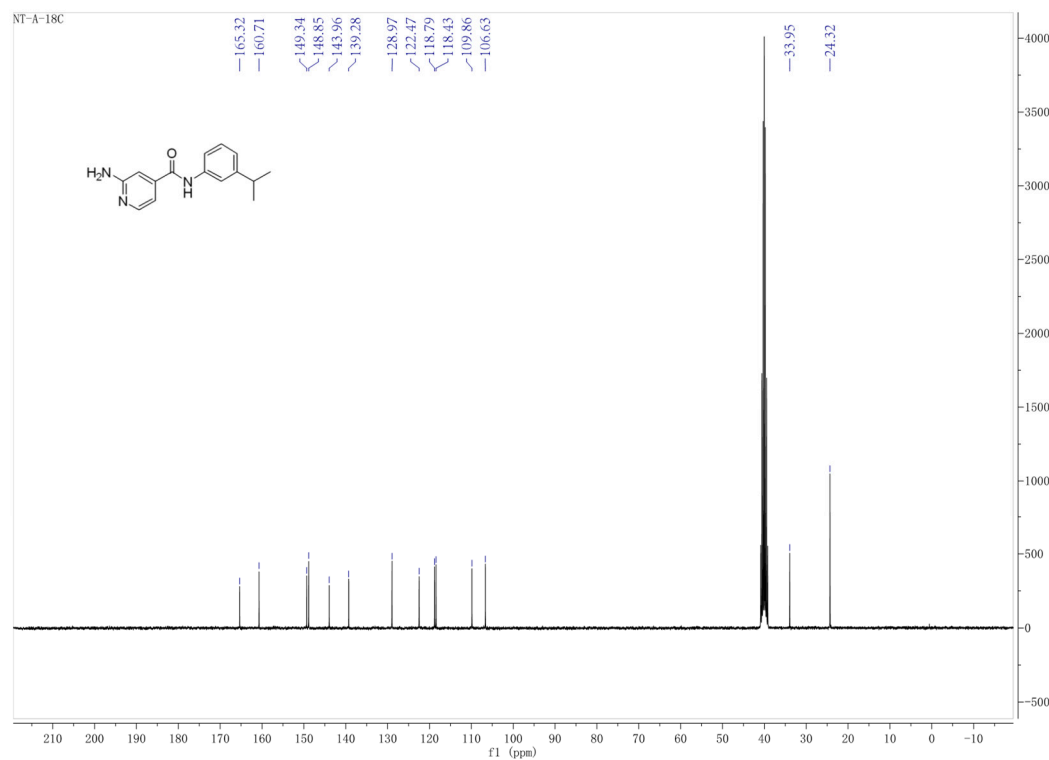

**<sup>13</sup>C NMR spectra of 16x**

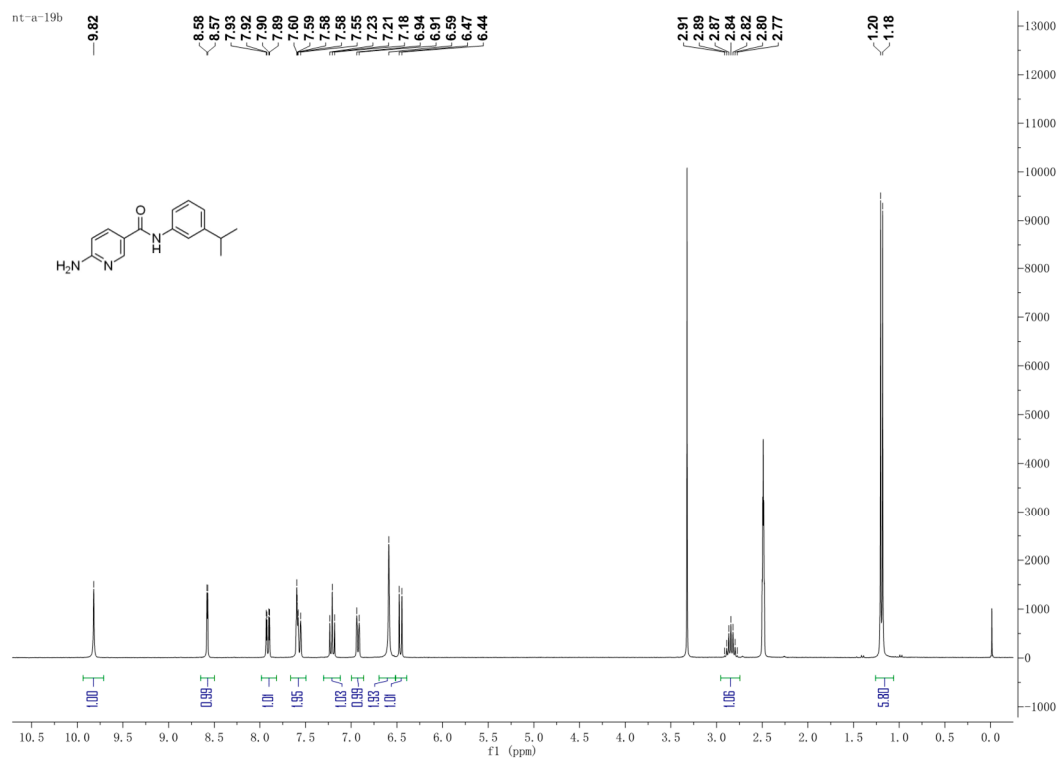

**<sup>1</sup>H NMR spectra of 16y**

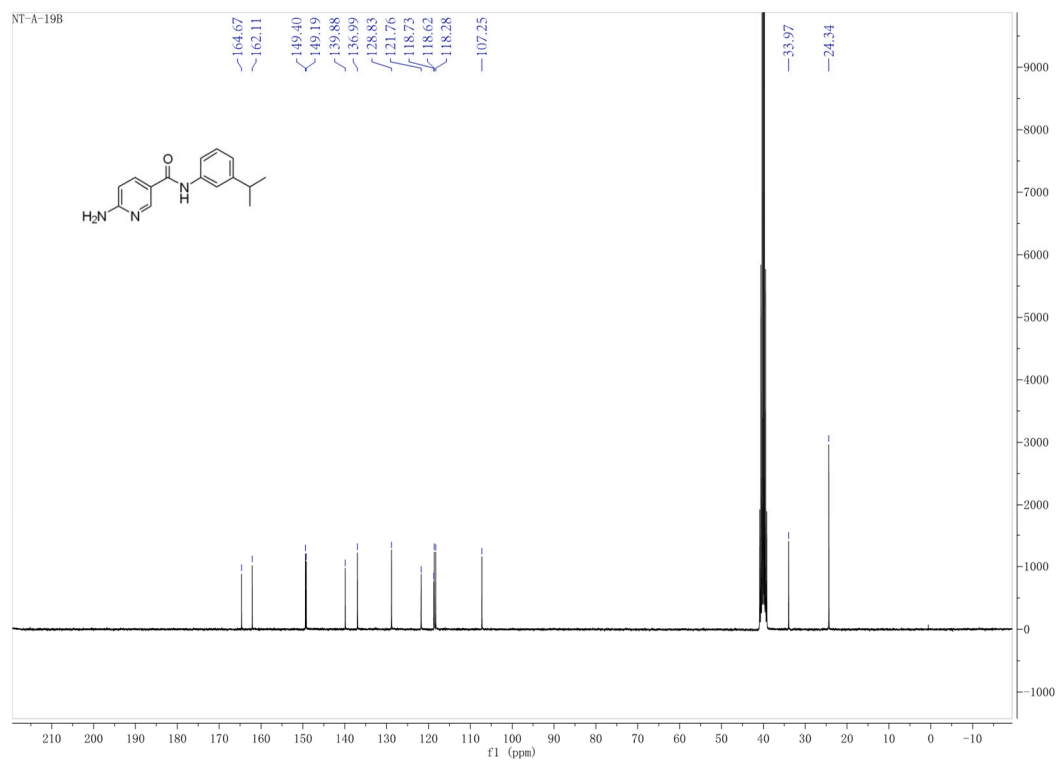

**<sup>13</sup>C NMR spectra of 16y**

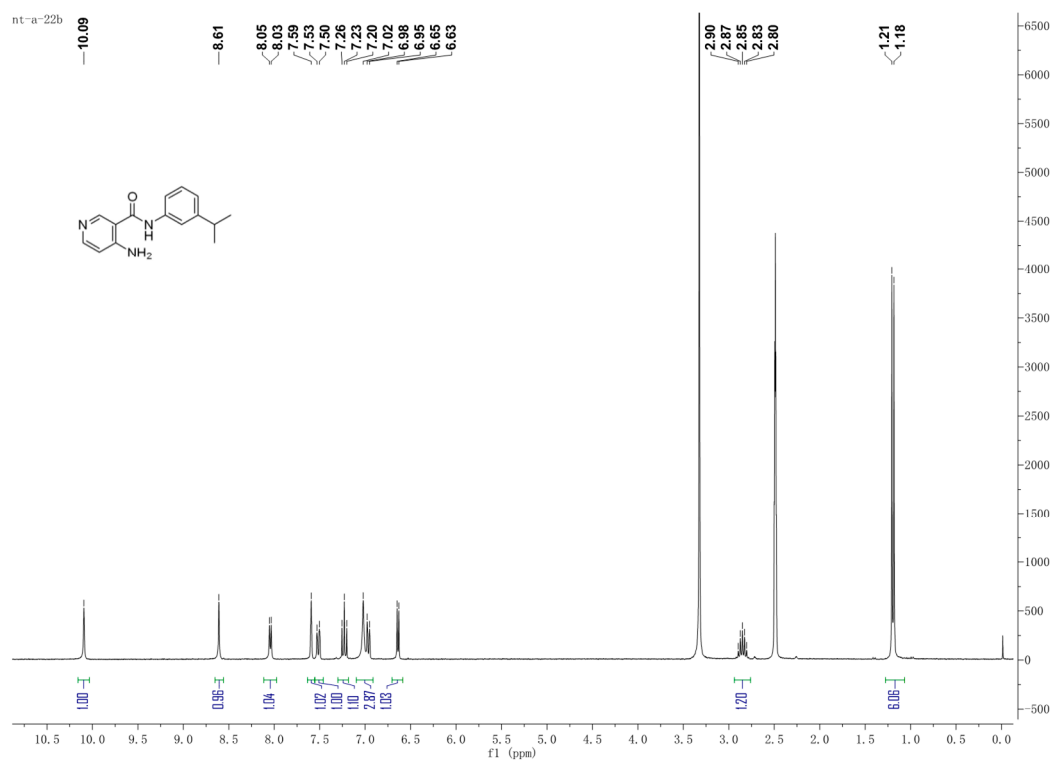

**<sup>1</sup>H NMR spectra of 16z**

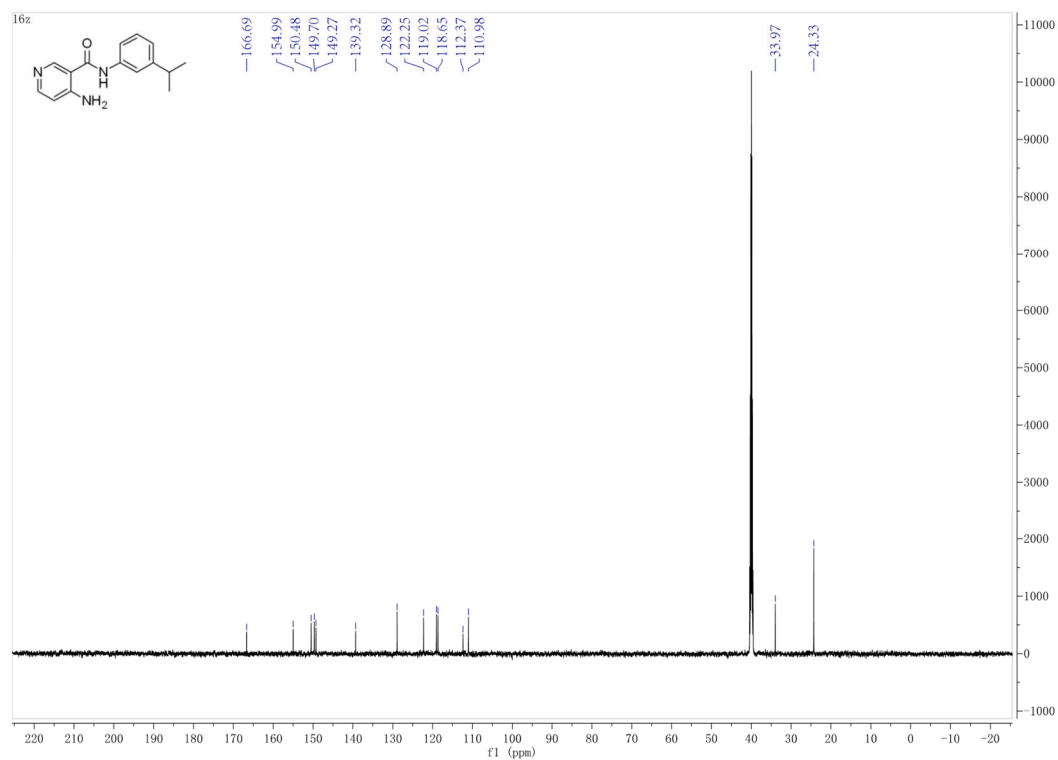

**<sup>13</sup>C NMR spectra of 16z**

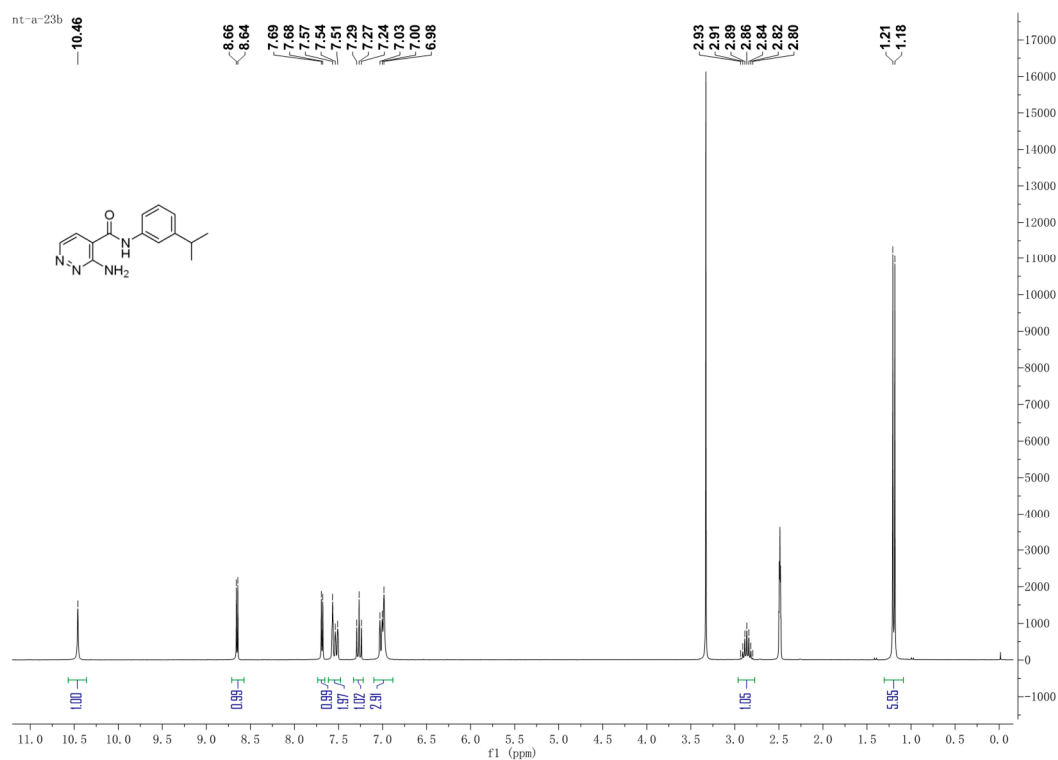

**<sup>1</sup>H NMR spectra of 17**

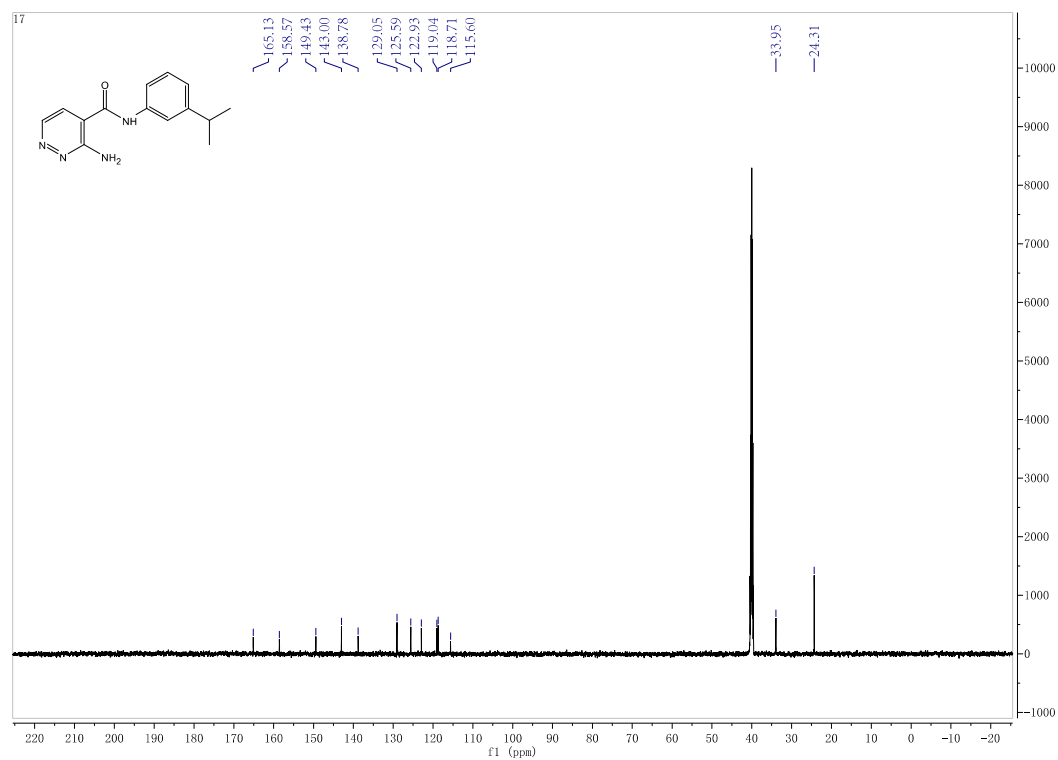

**<sup>13</sup>C NMR spectra of 17**

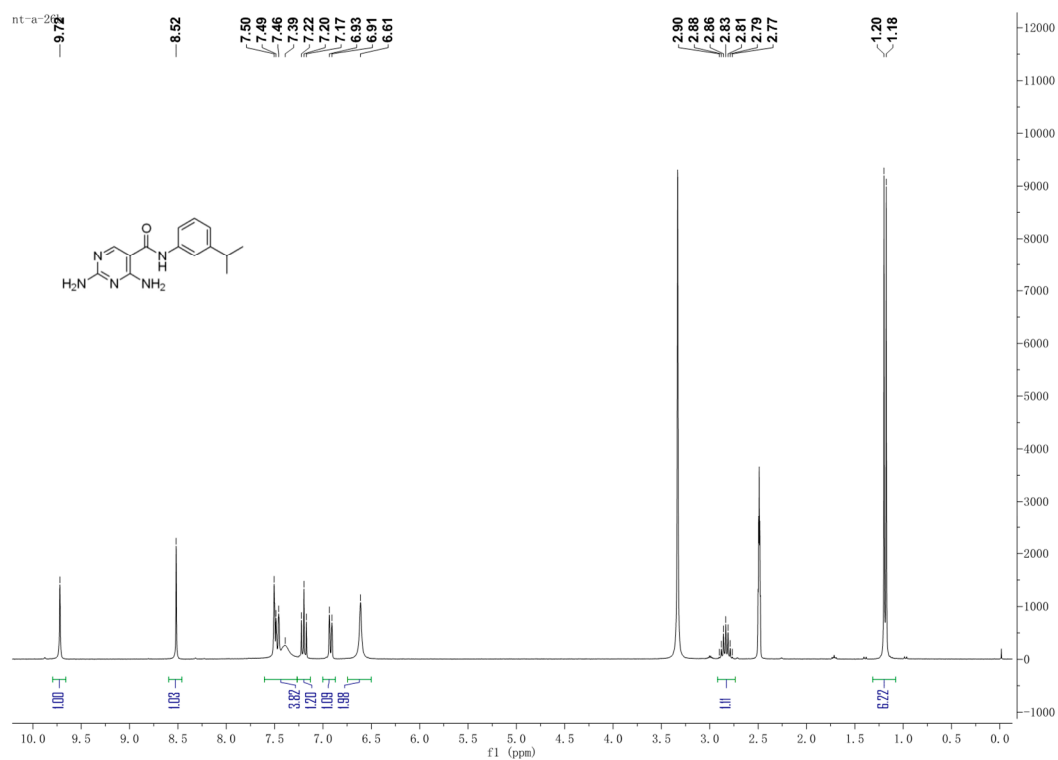

**<sup>1</sup>H NMR spectra of 18a**

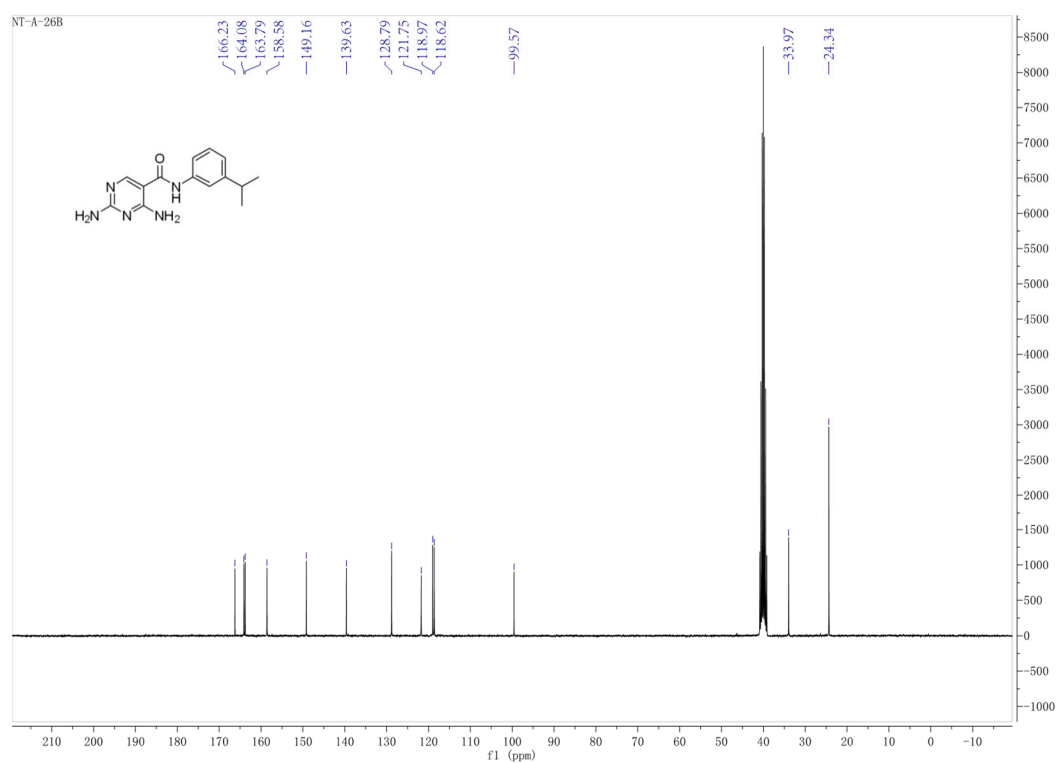

**<sup>13</sup>C NMR spectra of 18a**

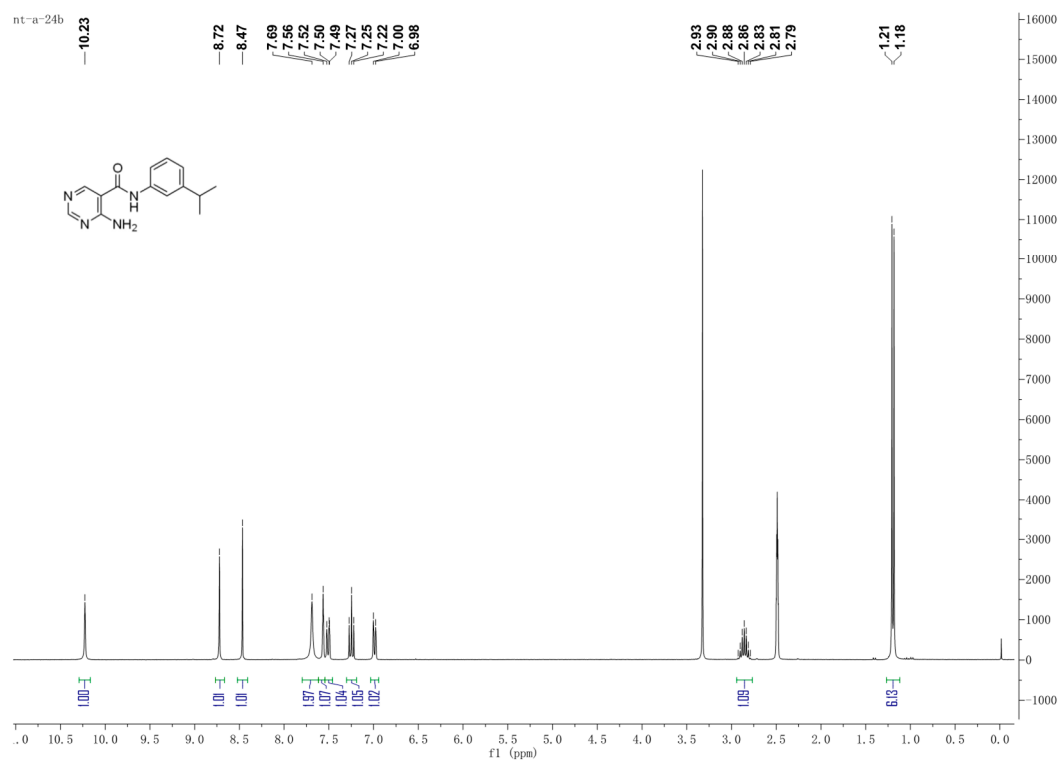

**<sup>1</sup>H NMR spectra of 18b**

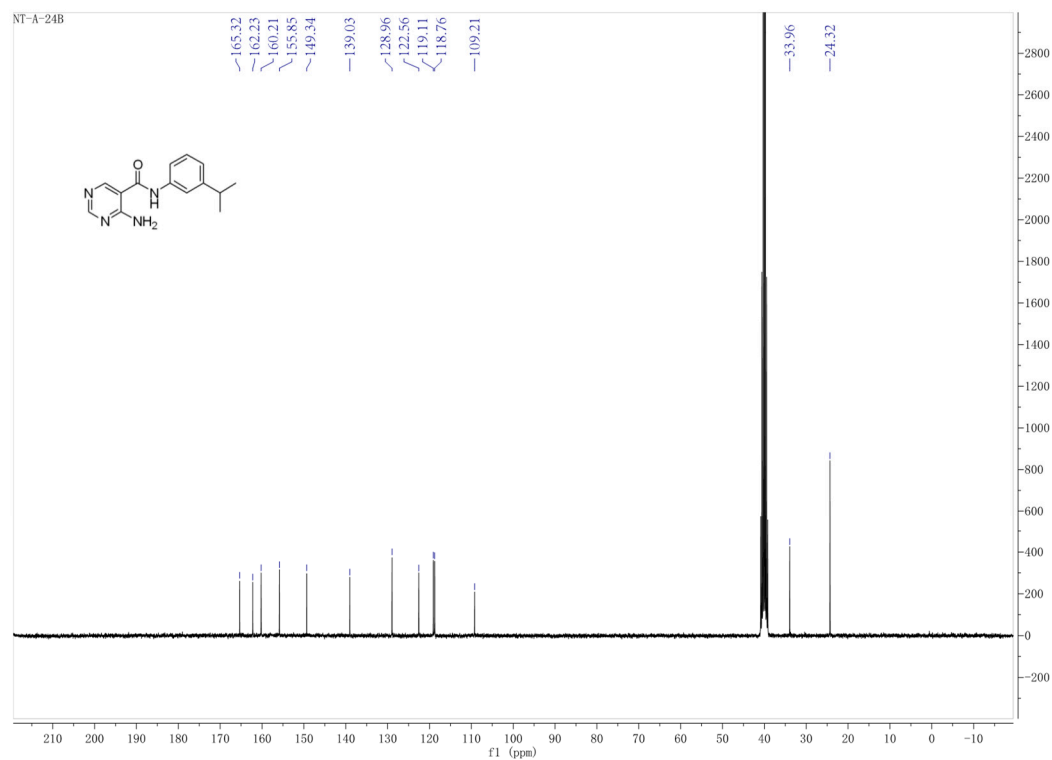

**<sup>13</sup>C NMR spectra of 18b**

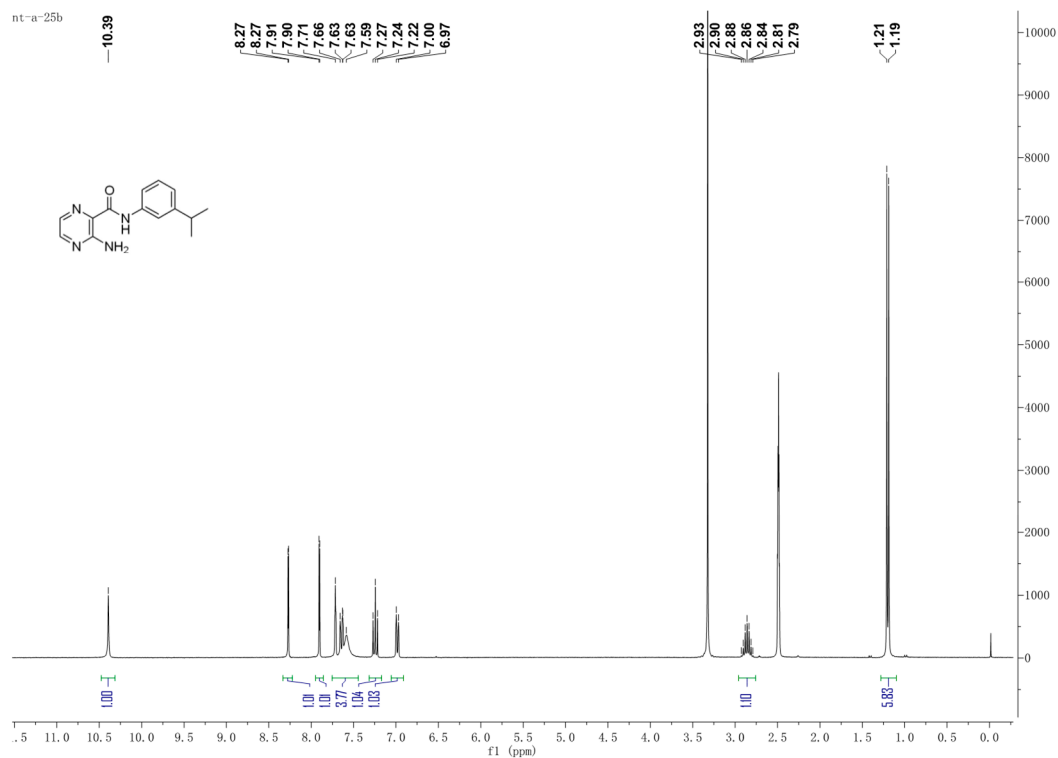

**<sup>1</sup>H NMR spectra of 19**

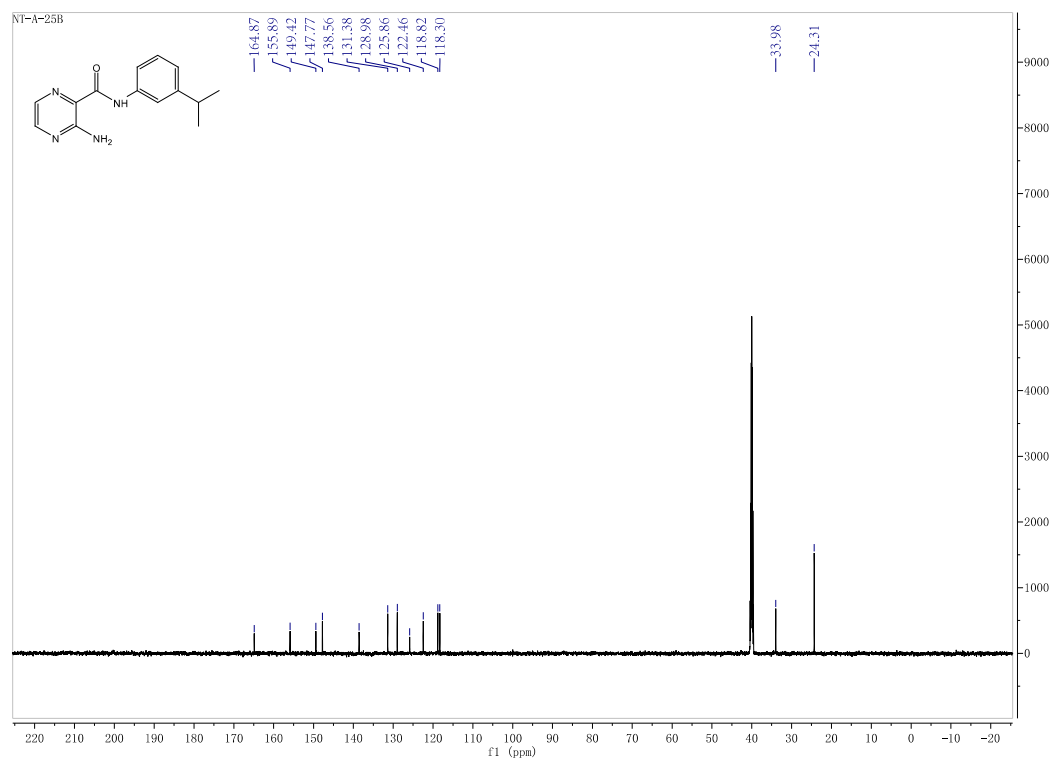

**<sup>13</sup>C NMR spectra of 19**

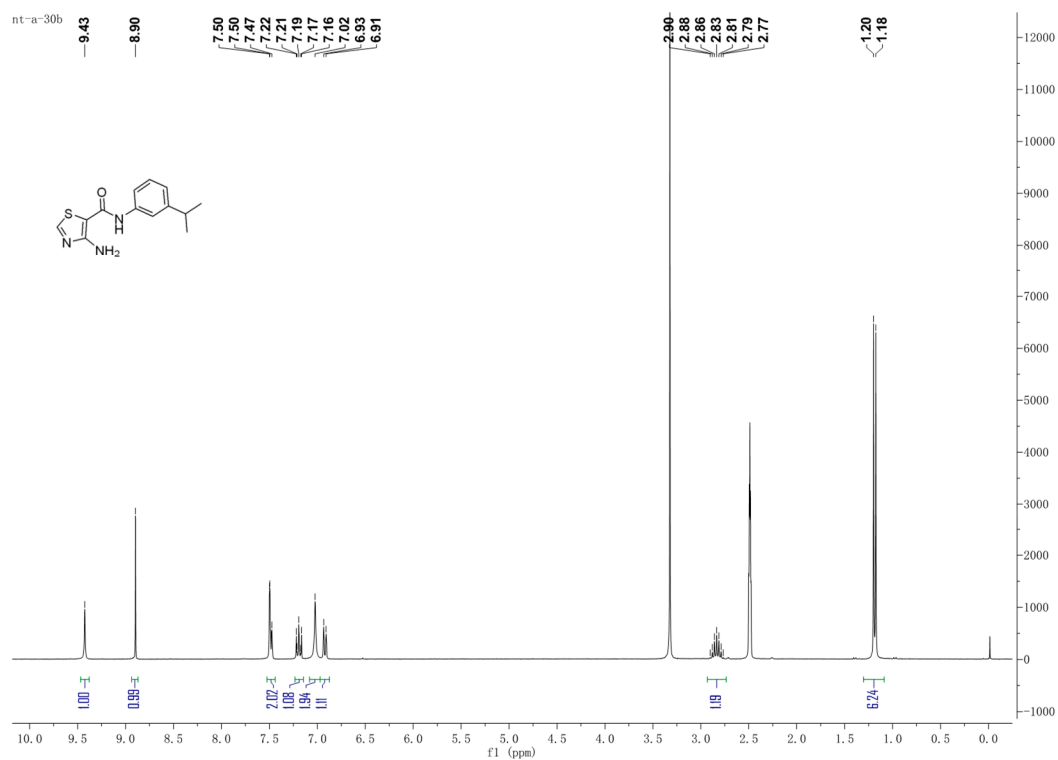

**<sup>1</sup>H NMR spectra of 20**

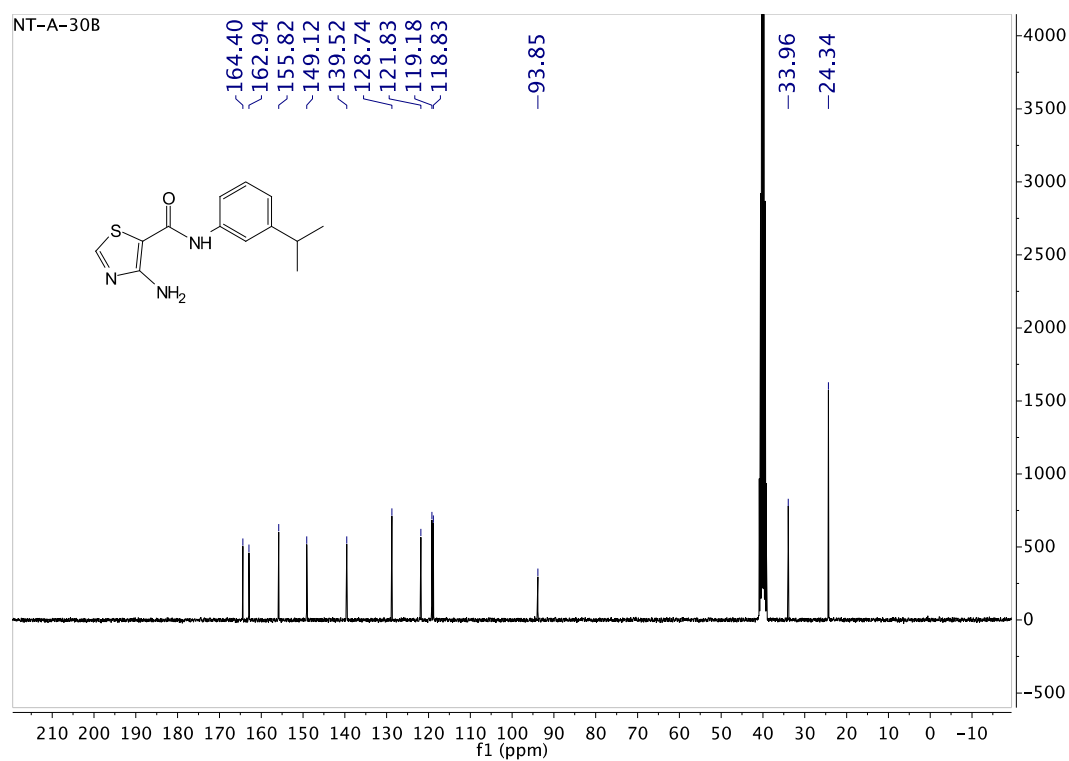

**<sup>13</sup>C NMR spectra of 20**



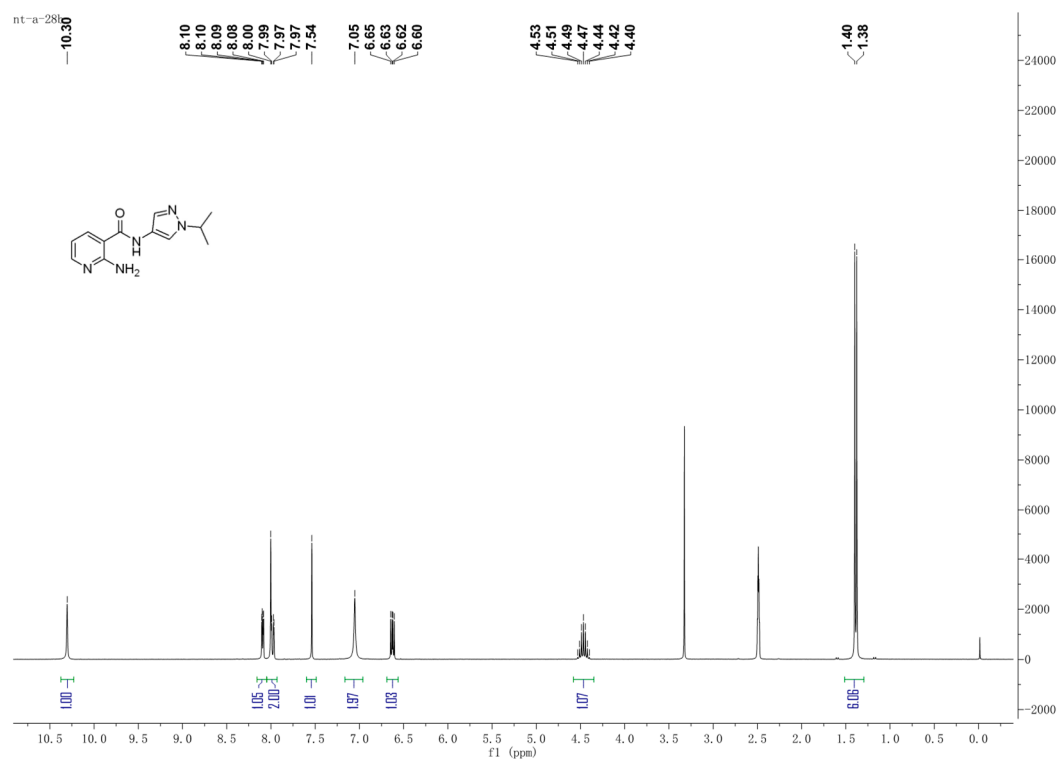

**<sup>1</sup>H NMR spectra of 21**

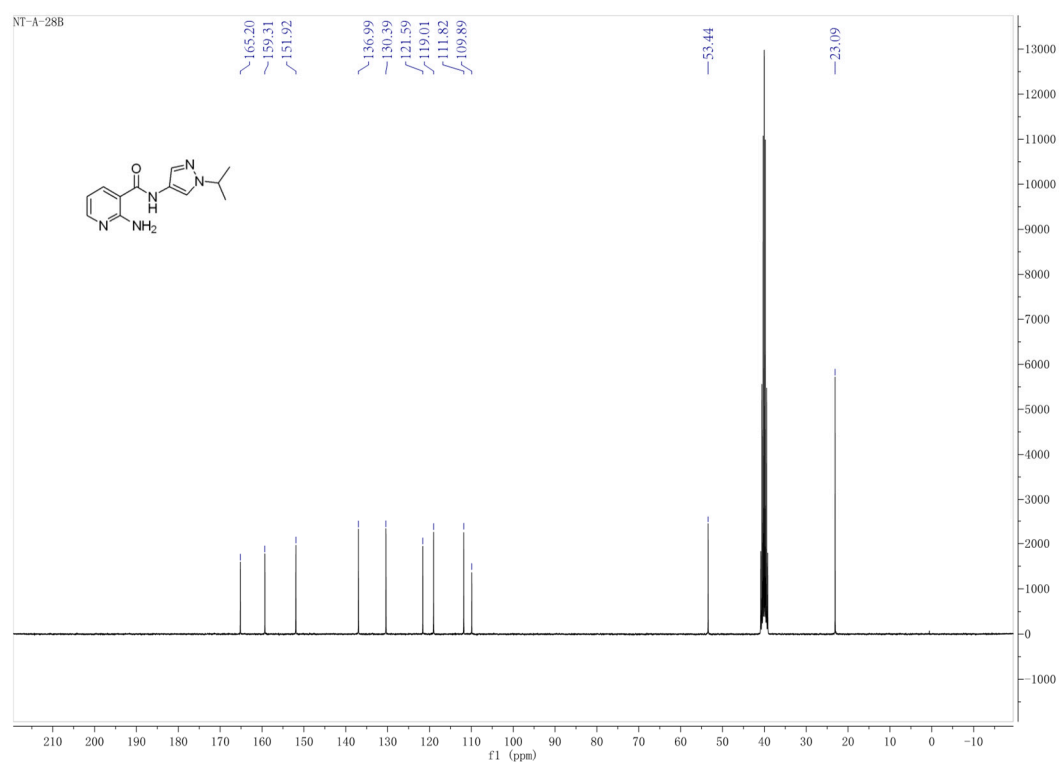

**<sup>13</sup>C NMR spectra of 21**

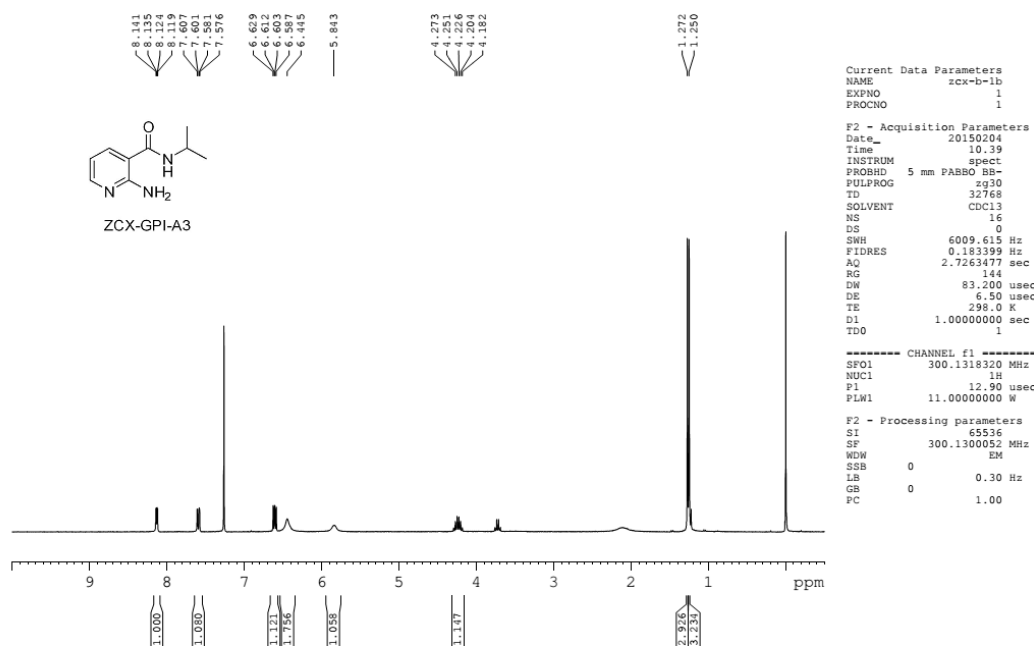

**<sup>1</sup>H NMR spectra of 22a**

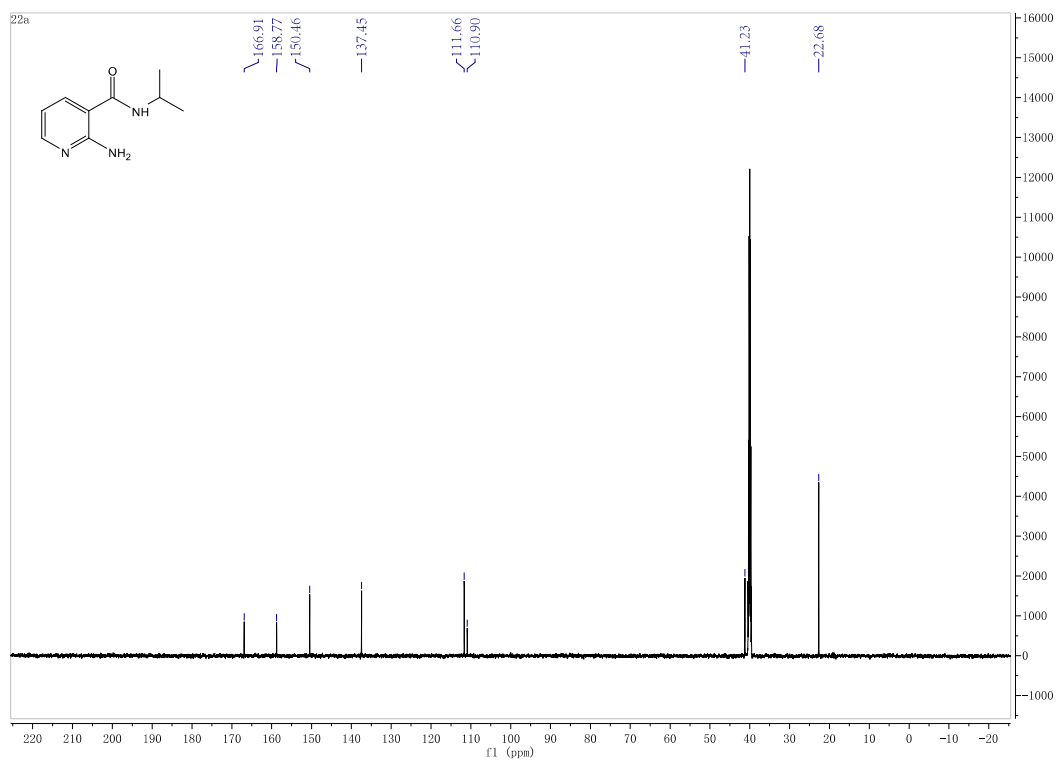

**<sup>13</sup>C NMR spectra of 22a**

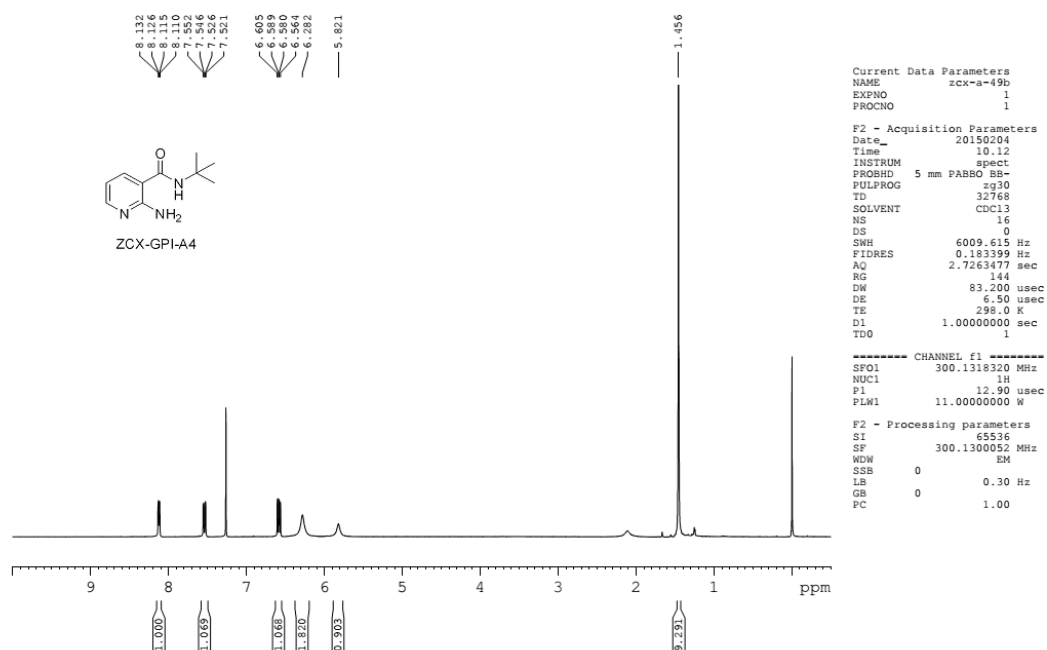

### <sup>1</sup>H NMR spectra of 22b

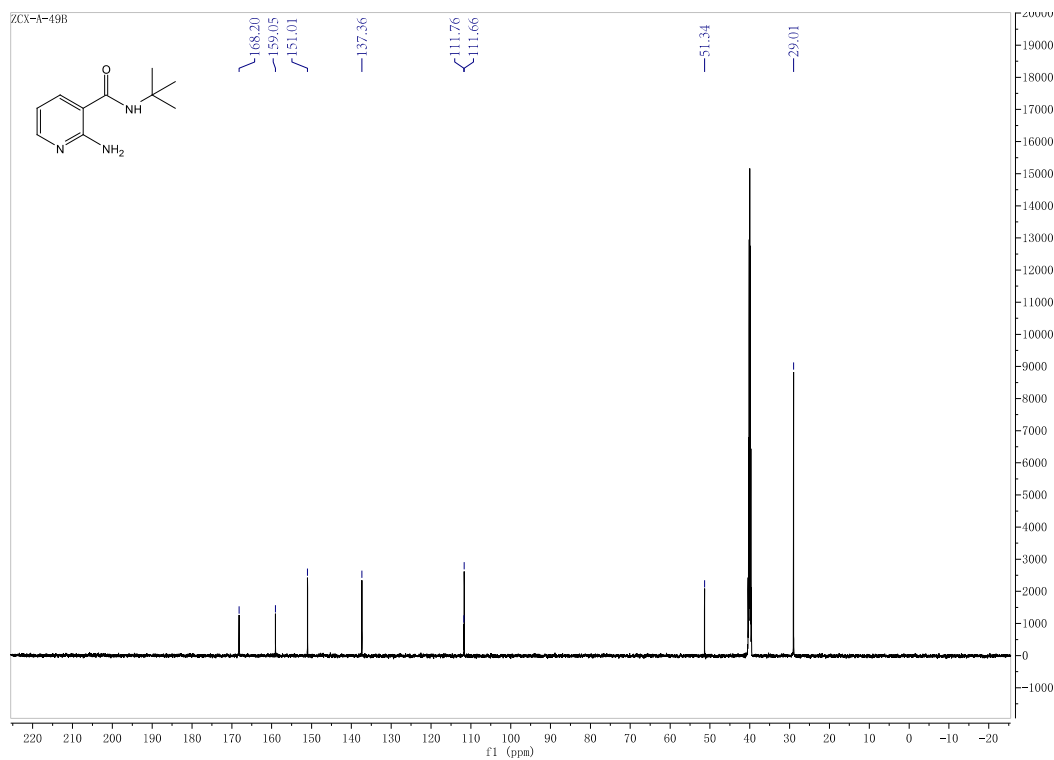

### <sup>13</sup>C NMR spectra of 22b

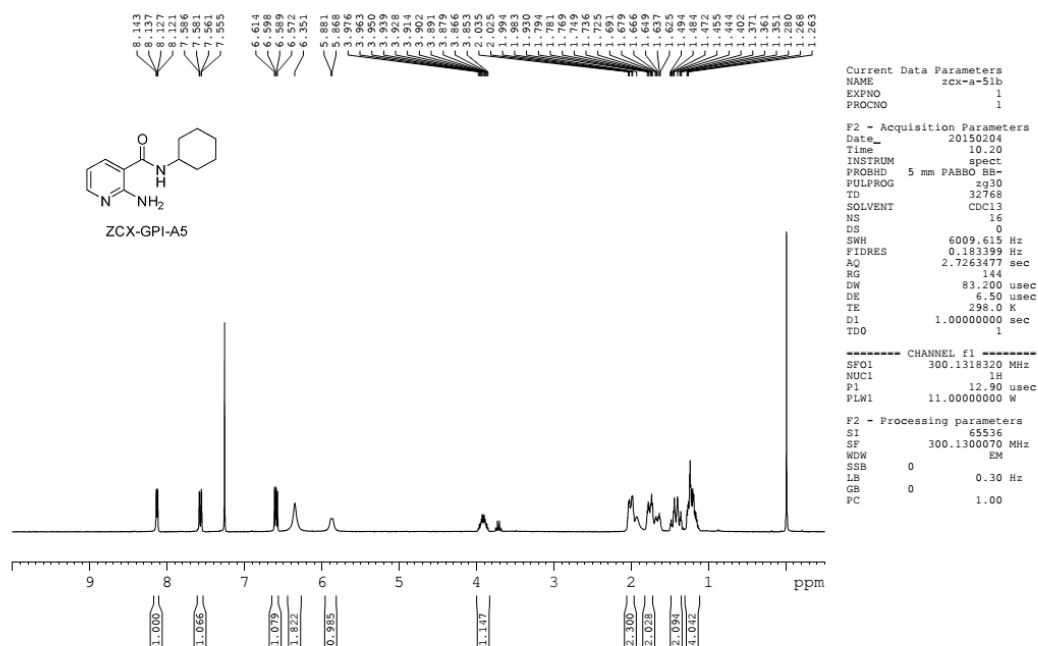

**<sup>1</sup>H NMR spectra of 22c**

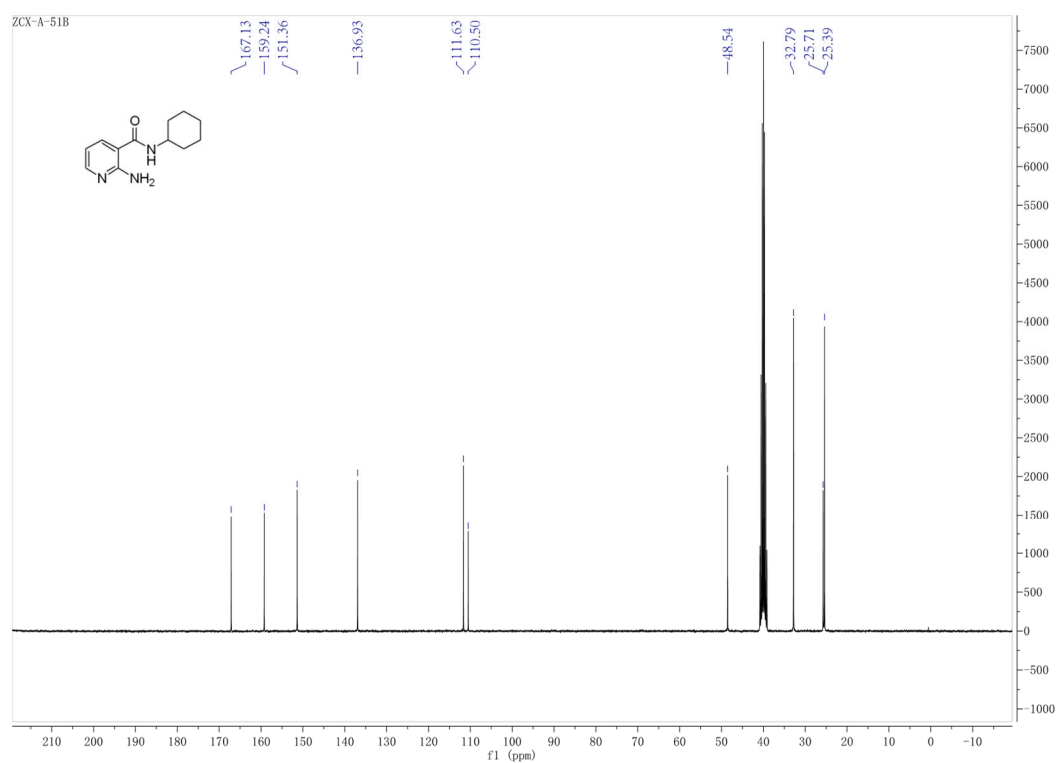

**<sup>13</sup>C NMR spectra of 22c**

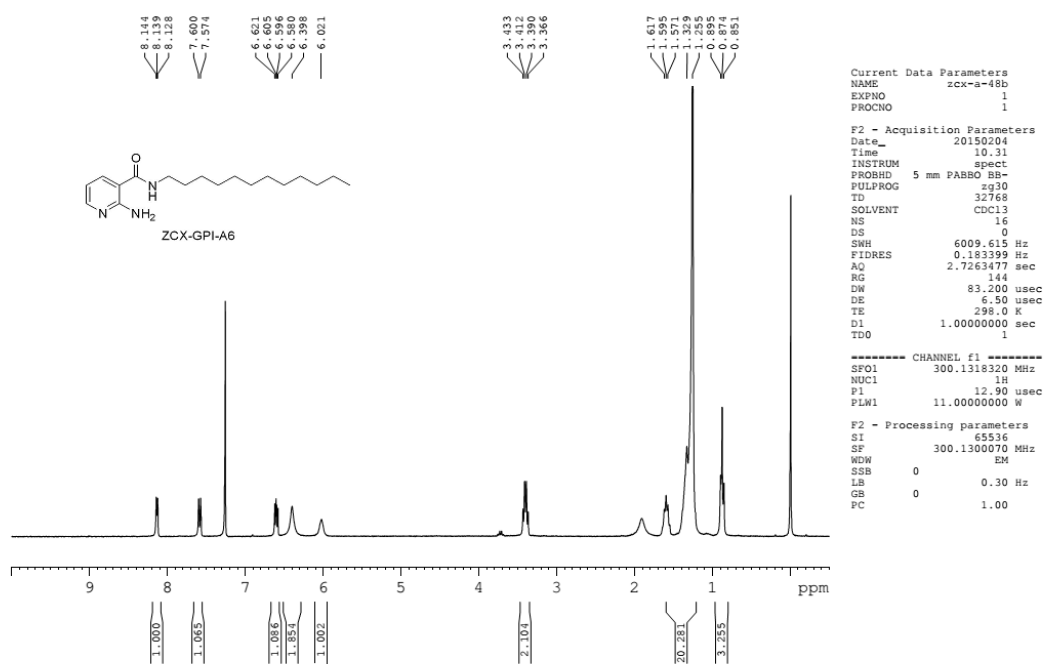

**$^1\text{H}$  NMR spectra of 22d**

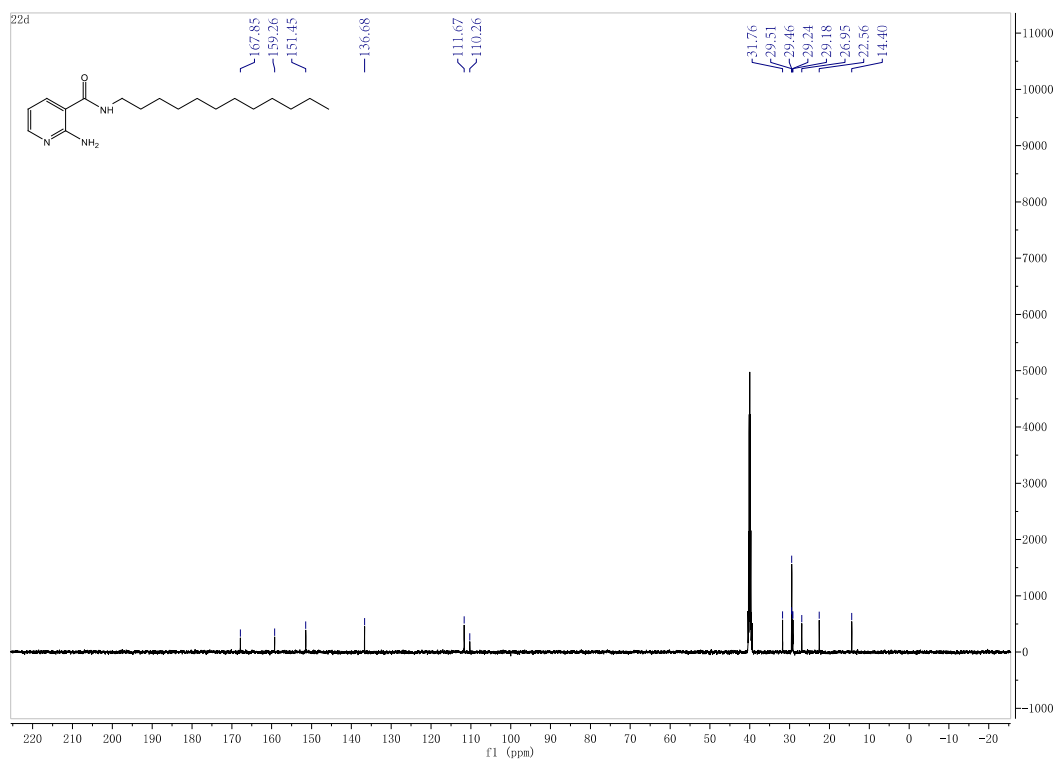

**$^{13}\text{C}$  NMR spectra of 22d**

# HPLC Spectra of Representative Compounds

Data File C:\CHEM32\1\DATA\ZMZ\TEST 2023-01-11 09-52-18\16G-2U.D

Sample Name: 16g-2u

```
=====
Acq. Operator   : SYSTEM                      Seq. Line :    9
Acq. Instrument : 12601c                     Location  : Vial 41
Injection Date  : 1/11/2023 11:43:21 AM      Inj       :    1
                                           Inj Volume: 5.000 µl
Different Inj Volume from Sample Entry! Actual Inj Volume : 2.000 µl
Method          : C:\CHEM32\1\DATA\ZMZ\TEST 2023-01-11 09-52-18\TEST NTJH.M (Sequence Method)
Last changed    : 1/11/2023 9:52:18 AM by SYSTEM
=====
```

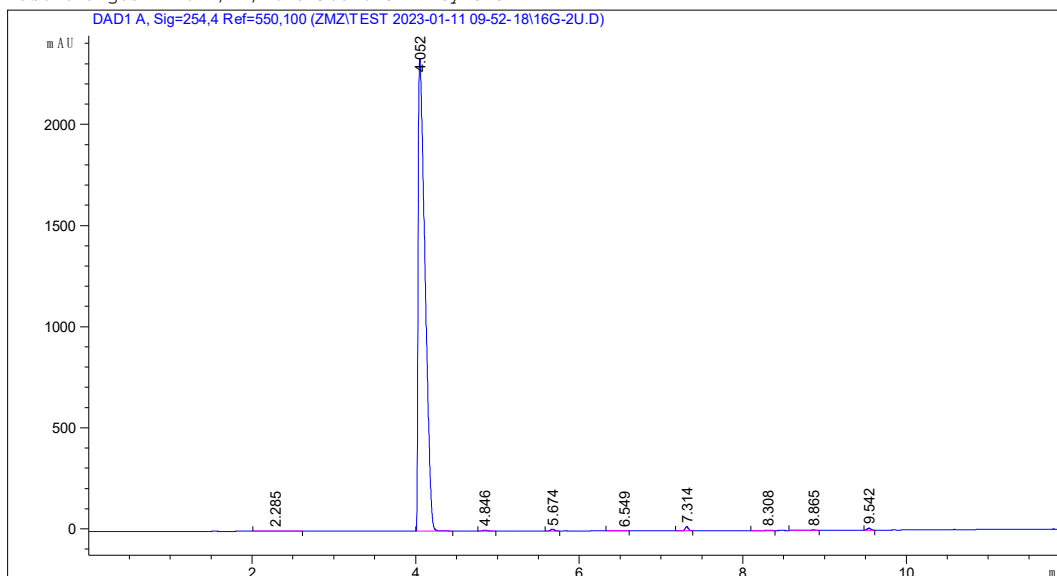

## Area Percent Report

```
=====
Sorted By      :      Signal
Multiplier     :      1.0000
Dilution       :      1.0000
Use Multiplier & Dilution Factor with ISTDs
=====
```

Signal 1: DAD1 A, Sig=254,4 Ref=550,100

| Peak # | RetTime [min] | Type | Width [min] | Area [mAU*s] | Height [mAU] | Area %  |
|--------|---------------|------|-------------|--------------|--------------|---------|
| 1      | 2.285         | BB   | 0.1964      | 31.20372     | 1.89748      | 0.2260  |
| 2      | 4.052         | BB   | 0.0910      | 1.36156e4    | 2334.45874   | 98.6292 |
| 3      | 4.846         | BB   | 0.0629      | 16.27699     | 3.96648      | 0.1179  |
| 4      | 5.674         | BV   | 0.0497      | 28.58175     | 8.85165      | 0.2070  |
| 5      | 6.549         | BV   | 0.0664      | 7.33513      | 1.54507      | 0.0531  |
| 6      | 7.314         | BV   | 0.0414      | 55.62617     | 20.65764     | 0.4029  |
| 7      | 8.308         | BB   | 0.0623      | 8.81839      | 1.98709      | 0.0639  |
| 8      | 8.865         | BB   | 0.0692      | 13.28968     | 2.68589      | 0.0963  |
| 9      | 9.542         | BB   | 0.0439      | 28.09934     | 9.96804      | 0.2035  |

## HPLC spectra of 16g

Sample Name: 16j-2u

```

=====
Acq. Operator   : SYSTEM                      Seq. Line :   12
Acq. Instrument : 12601c                     Location  : Vial 44
Injection Date  : 1/11/2023 12:24:45 PM      Inj       :    1
                                           Inj Volume: 5.000 µl

Different Inj Volume from Sample Entry! Actual Inj Volume : 2.000 µl
Acq. Method     : C:\CHEM32\1\DATA\ZMZ\TEST 2023-01-11 09-52-18\TEST NTJH.M
Last changed    : 1/11/2023 12:29:49 PM by SYSTEM
                  (modified after loading)
Analysis Method : C:\CHEM32\1\DATA\ZMZ\TEST 2023-01-11 09-52-18\TEST NTJH.M (Sequence Method)
Last changed    : 1/11/2023 9:52:18 AM by SYSTEM

```

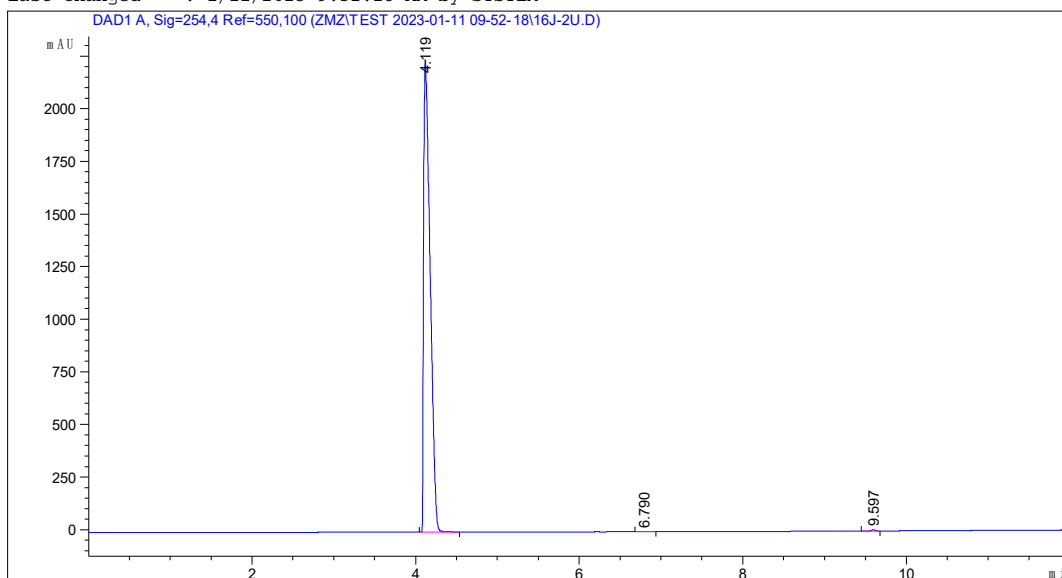

```

=====
                          Area Percent Report
=====

```

```

Sorted By      :      Signal
Multiplier     :      1.0000
Dilution       :      1.0000
Use Multiplier & Dilution Factor with ISTDs

```

Signal 1: DAD1 A, Sig=254,4 Ref=550,100

| Peak # | RetTime [min] | Type | Width [min] | Area [mAU*s] | Height [mAU] | Area %  |
|--------|---------------|------|-------------|--------------|--------------|---------|
| 1      | 4.119         | BV   | 0.0841      | 1.23168e4    | 2243.02368   | 99.8032 |
| 2      | 6.790         | BB   | 0.0612      | 5.75675      | 1.27470      | 0.0466  |
| 3      | 9.597         | BV   | 0.0453      | 18.52760     | 6.20405      | 0.1501  |

```
Totals :                      1.23410e4  2250.50243
```

**HPLC spectra of 16j**

Sample Name: 16p

```
=====
Acq. Operator   : SYSTEM                      Seq. Line :    6
Acq. Instrument : 12601c                     Location  : Vial 45
Injection Date  : 1/11/2023 11:02:04 AM      Inj       :    1
                                           Inj Volume: 5.000 µl
Different Inj Volume from Sample Entry! Actual Inj Volume : 2.000 µl
Method         : C:\CHEM32\1\DATA\ZMZ\TEST 2023-01-11 09-52-18\TEST NTJH.M (Sequence Method)
Last changed    : 1/11/2023 9:52:18 AM by SYSTEM
=====
```

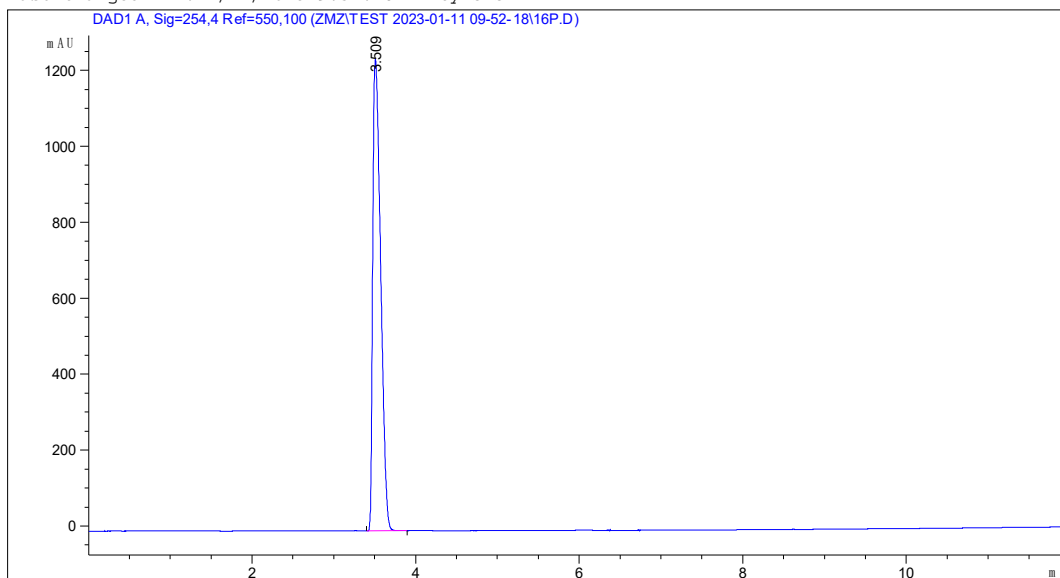

```
=====
                        Area Percent Report
=====
```

```
Sorted By      :      Signal
Multiplier     :      1.0000
Dilution       :      1.0000
Use Multiplier & Dilution Factor with ISTDs
```

Signal 1: DAD1 A, Sig=254,4 Ref=550,100

| Peak # | RetTime [min] | Type | Width [min] | Area [mAU*s] | Height [mAU] | Area %   |
|--------|---------------|------|-------------|--------------|--------------|----------|
| 1      | 3.509         | BB   | 0.1074      | 8352.11426   | 1243.42444   | 100.0000 |

```
Totals :                      8352.11426 1243.42444
```

```
=====
*** End of Report ***
=====
```

## HPLC spectra of 16p



Sample Name: 16t-2u

```

=====
Acq. Operator   : SYSTEM                      Seq. Line :   11
Acq. Instrument : 12601c                     Location  : Vial 43
Injection Date  : 1/11/2023 12:11:00 PM      Inj       :    1
                                           Inj Volume: 5.000 µl
Different Inj Volume from Sample Entry! Actual Inj Volume : 2.000 µl
Method         : C:\CHEM32\1\DATA\ZMZ\TEST 2023-01-11 09-52-18\TEST NTJH.M (Sequence Method)
Last changed    : 1/11/2023 9:52:18 AM by SYSTEM
=====

```

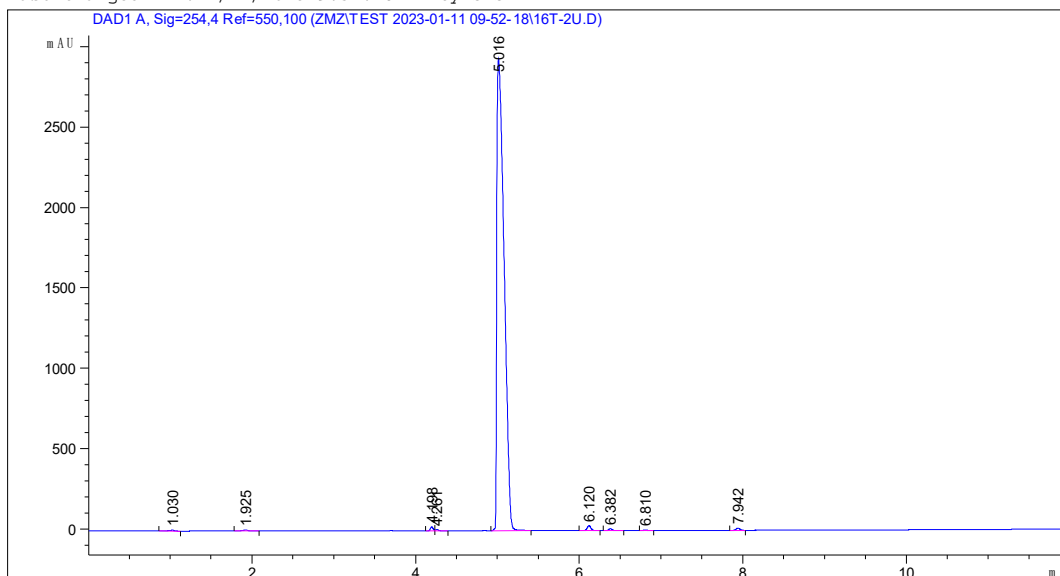

```

=====
                        Area Percent Report
=====

```

```

Sorted By           :      Signal
Multiplier          :      1.0000
Dilution            :      1.0000
Use Multiplier & Dilution Factor with ISTDs

```

Signal 1: DAD1 A, Sig=254,4 Ref=550,100

| Peak # | RetTime [min] | Type | Width [min] | Area [mAU*s] | Height [mAU] | Area %  |
|--------|---------------|------|-------------|--------------|--------------|---------|
| 1      | 1.030         | BB   | 0.0534      | 29.00068     | 7.28464      | 0.1583  |
| 2      | 1.925         | BB   | 0.0601      | 29.14332     | 6.85114      | 0.1591  |
| 3      | 4.198         | BV   | 0.0347      | 55.14526     | 24.55021     | 0.3010  |
| 4      | 4.261         | VB   | 0.0359      | 18.40388     | 7.68926      | 0.1005  |
| 5      | 5.016         | BV   | 0.0966      | 1.80087e4    | 2935.12622   | 98.3058 |
| 6      | 6.120         | BB   | 0.0468      | 91.93481     | 30.36506     | 0.5019  |
| 7      | 6.382         | BB   | 0.0442      | 31.55243     | 10.92328     | 0.1722  |
| 8      | 6.810         | BB   | 0.0458      | 12.31413     | 4.19324      | 0.0672  |
| 9      | 7.942         | BB   | 0.0474      | 42.86133     | 14.12904     | 0.2340  |

## HPLC spectra of 16t

Data File C:\CHEM32\1\DATA\ZMZ\TEST 2023-01-11 09-52-18\19.D  
Sample Name: 19

```
=====
Acq. Operator   : SYSTEM                      Seq. Line :    7
Acq. Instrument : 12601c                     Location  : Vial 46
Injection Date  : 1/11/2023 11:15:49 AM      Inj       :    1
                                           Inj Volume: 5.000 µl
Different Inj Volume from Sample Entry! Actual Inj Volume : 2.000 µl
Method         : C:\CHEM32\1\DATA\ZMZ\TEST 2023-01-11 09-52-18\TEST NTJH.M (Sequence Method)
Last changed    : 1/11/2023 9:52:18 AM by SYSTEM
=====
```

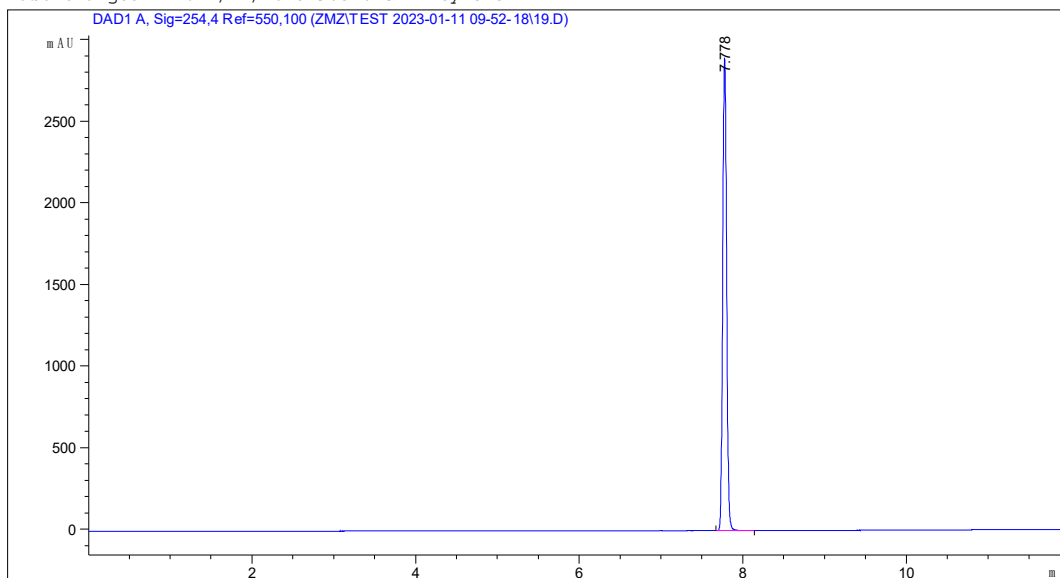

```
=====
                          Area Percent Report
=====
```

```
Sorted By      :      Signal
Multiplier     :      1.0000
Dilution       :      1.0000
Use Multiplier & Dilution Factor with ISTDs
```

Signal 1: DAD1 A, Sig=254,4 Ref=550,100

| Peak # | RetTime [min] | Type | Width [min] | Area [mAU*s] | Height [mAU] | Area %   |
|--------|---------------|------|-------------|--------------|--------------|----------|
| 1      | 7.778         | BV   | 0.0524      | 9641.09277   | 2891.20068   | 100.0000 |

Totals :                      9641.09277 2891.20068

```
=====
*** End of Report ***
=====
```

## HPLC spectra of 19
